# Supplementary material for: Enantioselective aza-Henry reaction of t-Boc protected imines and nitroalkanes with bifunctional squaramide organocatalysts
Source: Royal Society of Chemistry journal article supplement (doi:10.1039/c6nj04078k), 2017-01-01
Supplement: c6nj04078k1.pdf [file c6nj04078k1.pdf]

# Supporting Information

## New Journal of Chemistry

### Enantioselective Aza-Henry Reaction of *t*-Boc Protected Imines and Nitroalkanes with Bifunctional Squaramide Organocatalysts

Dilşad Susam, Cihangir Tanyeli\*

*Department of Chemistry, Middle East Technical University, 06800 Ankara, Turkey*

[tanyeli@metu.edu.tr](mailto:tanyeli@metu.edu.tr)

|                                                   |    |
|---------------------------------------------------|----|
| 1. $^1\text{H}$ and $^{13}\text{C}$ Spectra ..... | 2  |
| 2. HPLC Chromatograms .....                       | 15 |

# 1. $^1\text{H}$ and $^{13}\text{C}$ Spectra

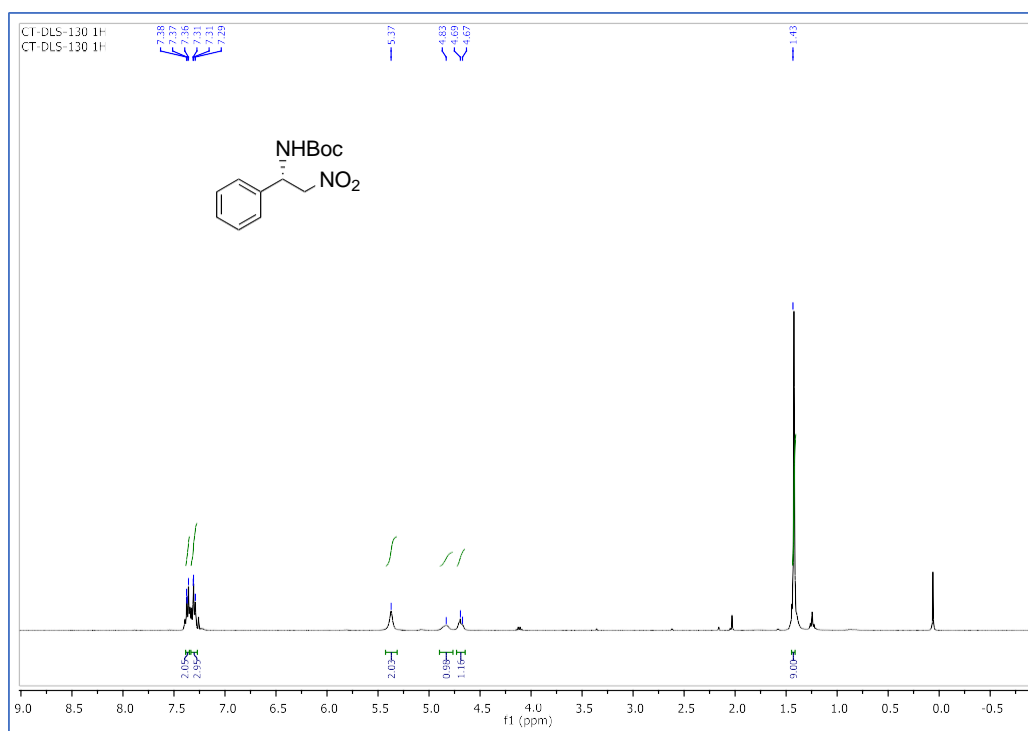

Figure 1.  $^1\text{H}$  NMR spectrum of compound **2a**

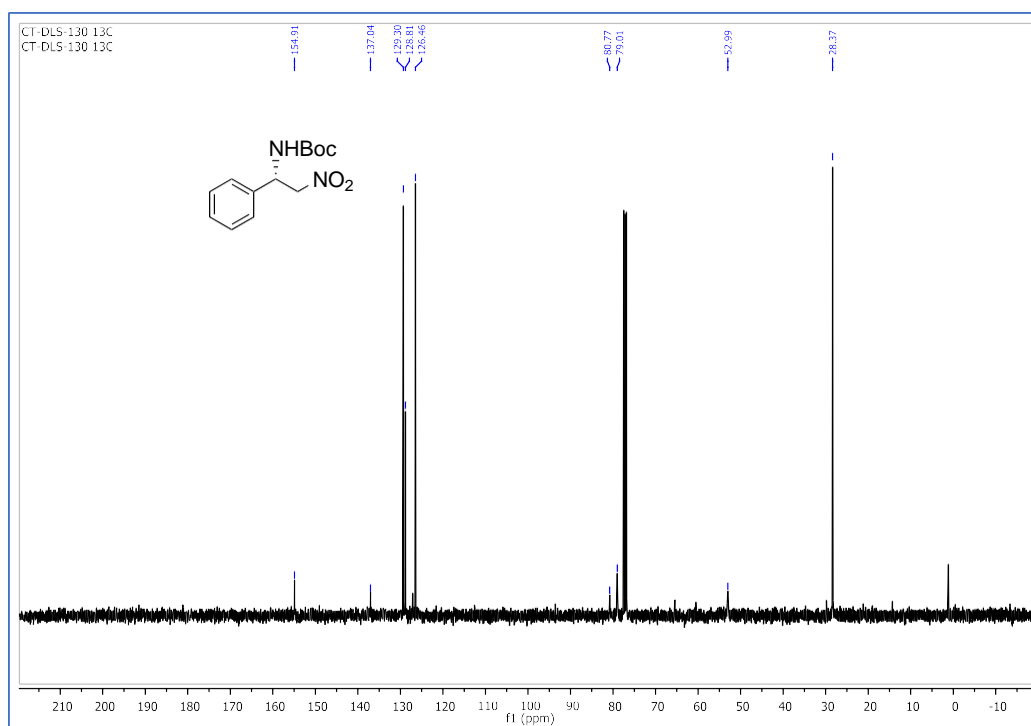

Figure 2.  $^{13}\text{C}$  NMR spectrum of compound **2a**

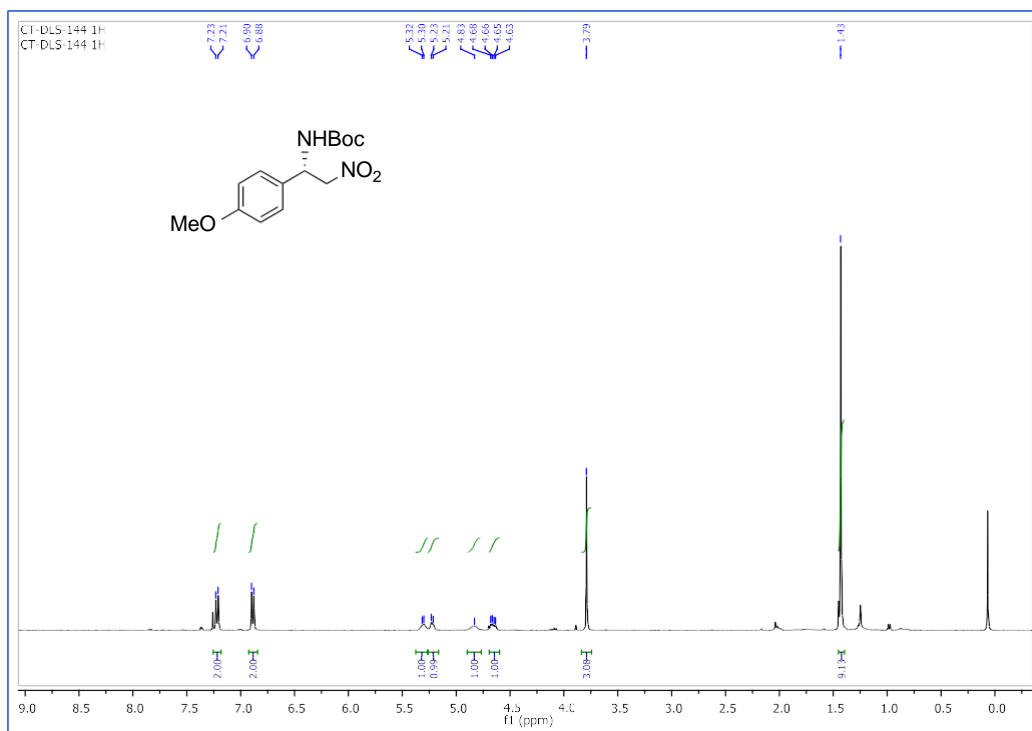

Figure 3.  $^1\text{H}$  NMR spectrum of compound 2b

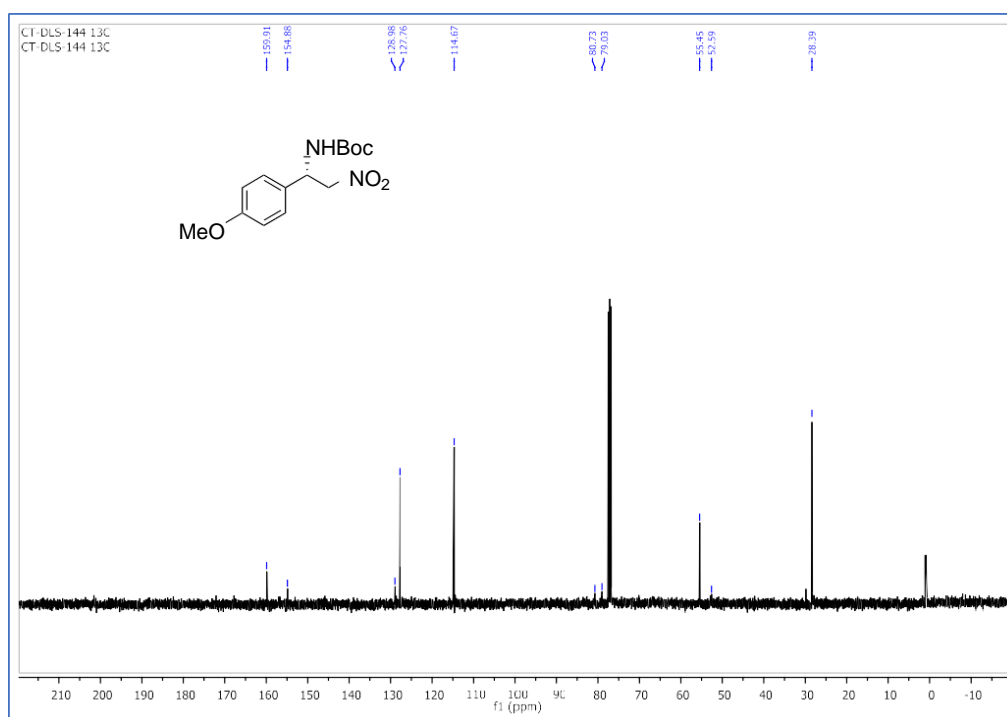

Figure 4.  $^{13}\text{C}$  NMR spectrum of compound 2b

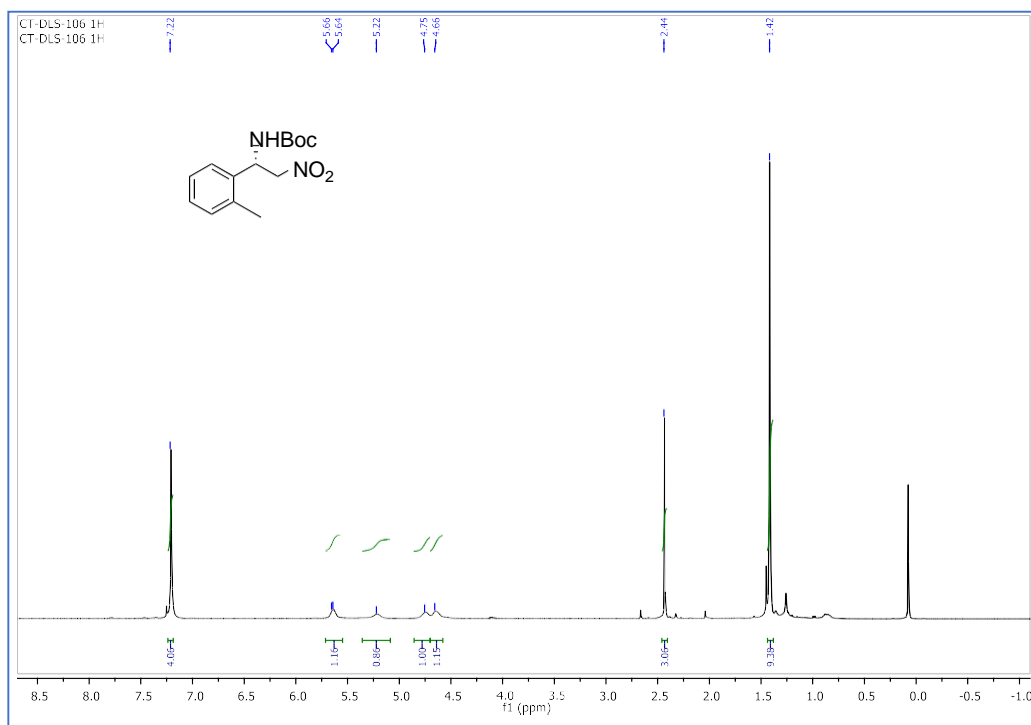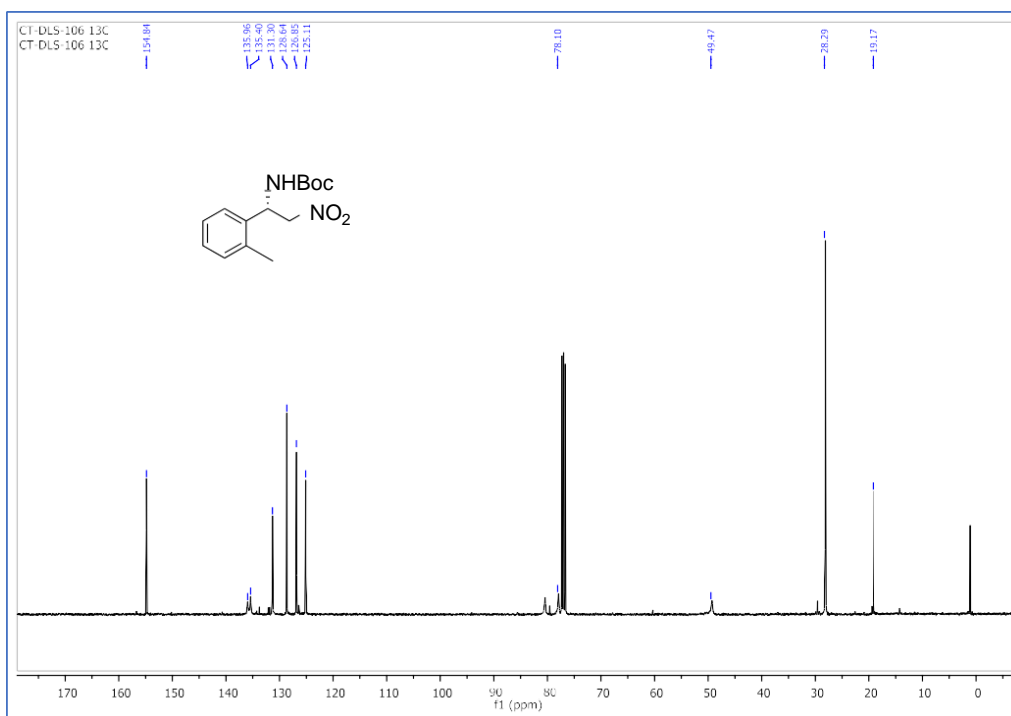

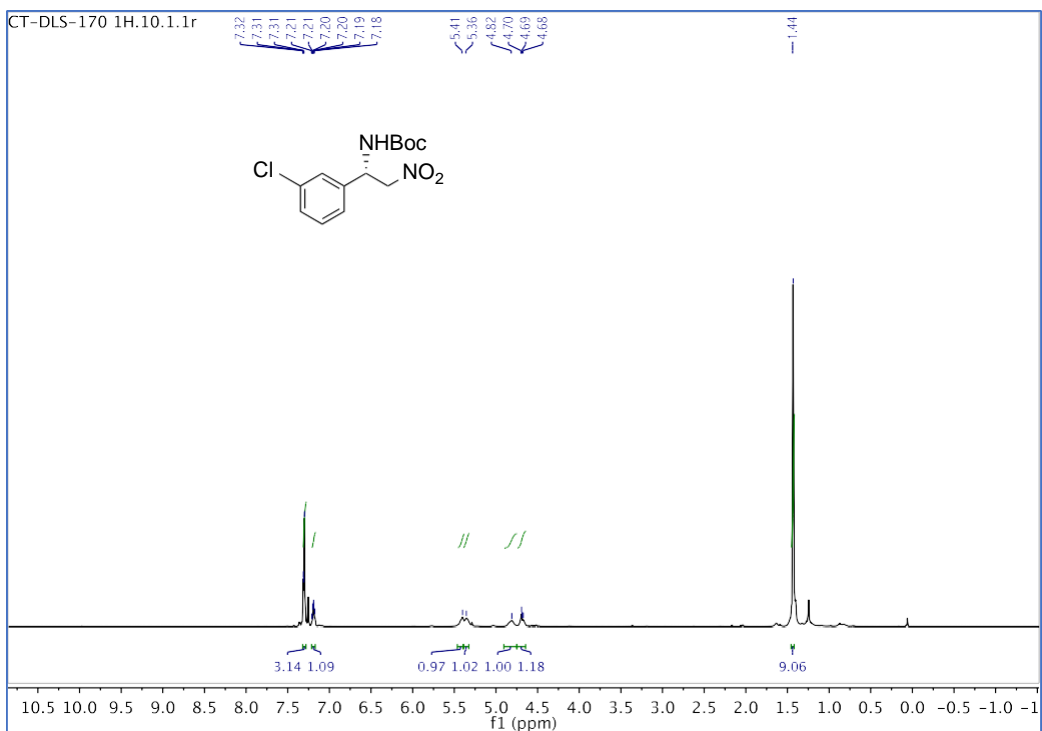

**Figure 7.**  $^1\text{H}$  NMR spectrum of compound **2d**

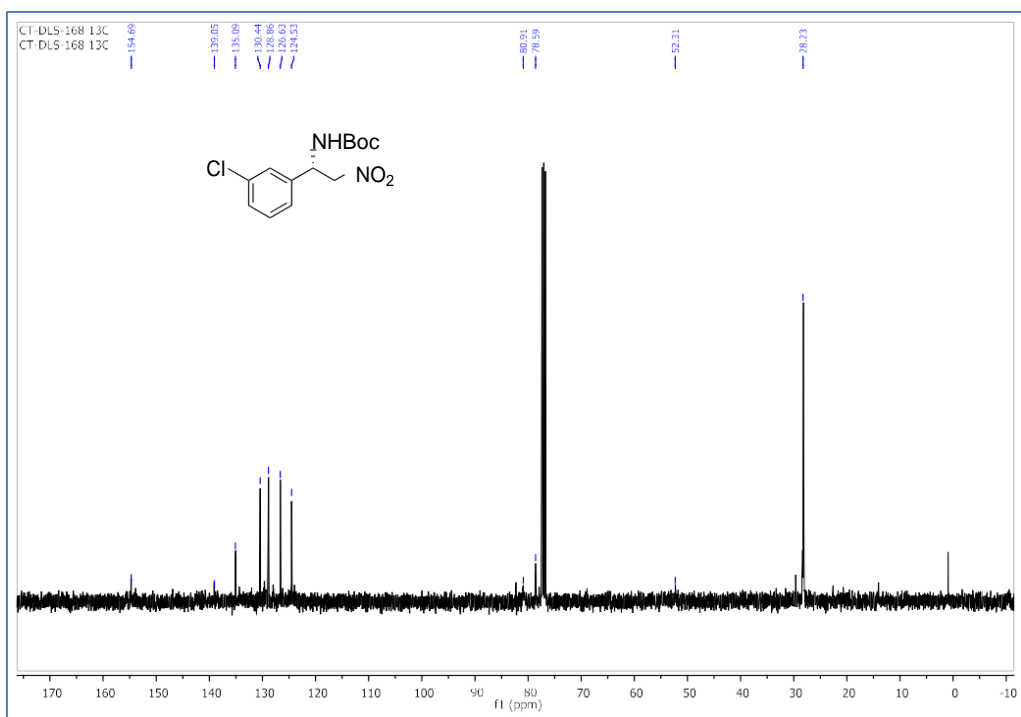

**Figure 8.**  $^{13}\text{C}$  NMR spectrum of compound **2d**

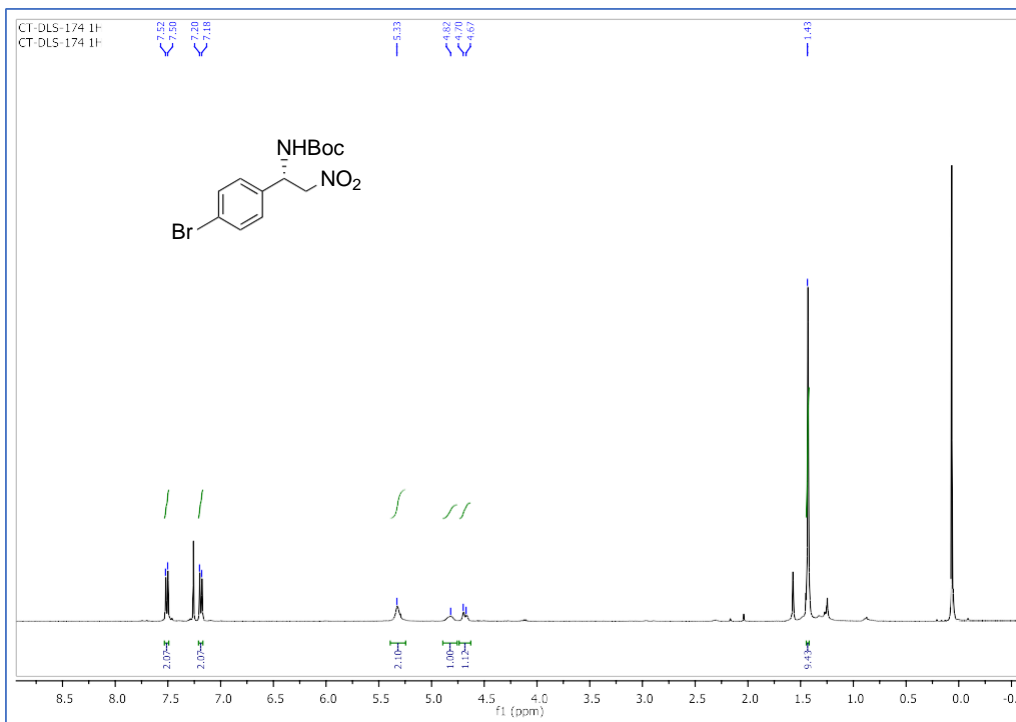

Figure 9.  $^1\text{H}$  NMR spectrum of compound 2e

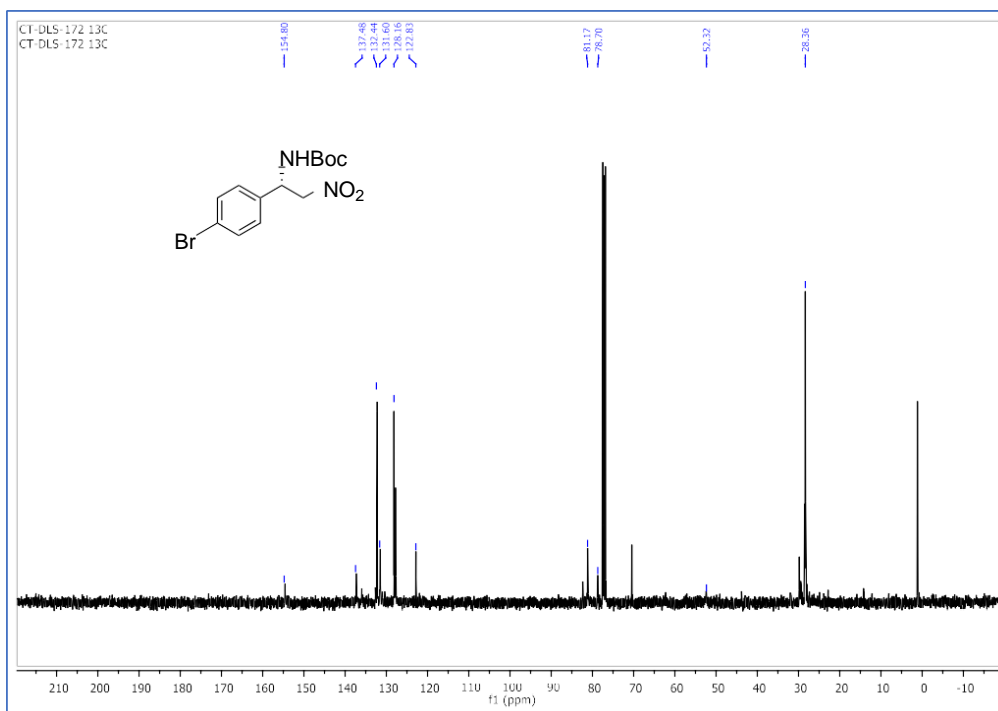

Figure 10.  $^{13}\text{C}$  NMR spectrum of compound 2e

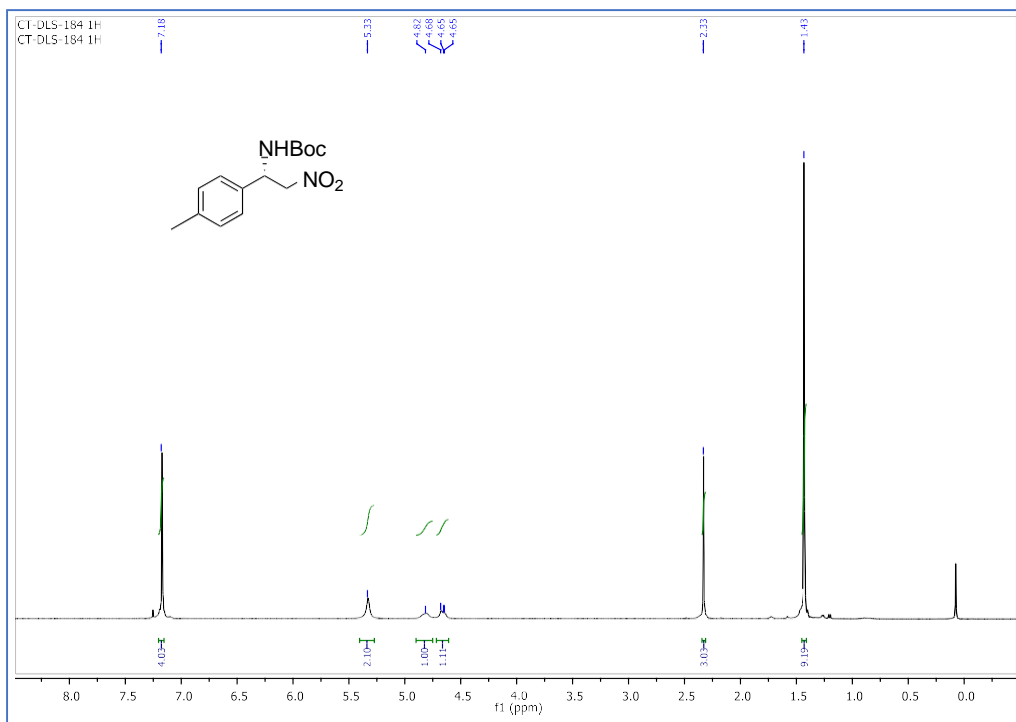

Figure 11. <sup>1</sup>H NMR spectrum of compound 2f

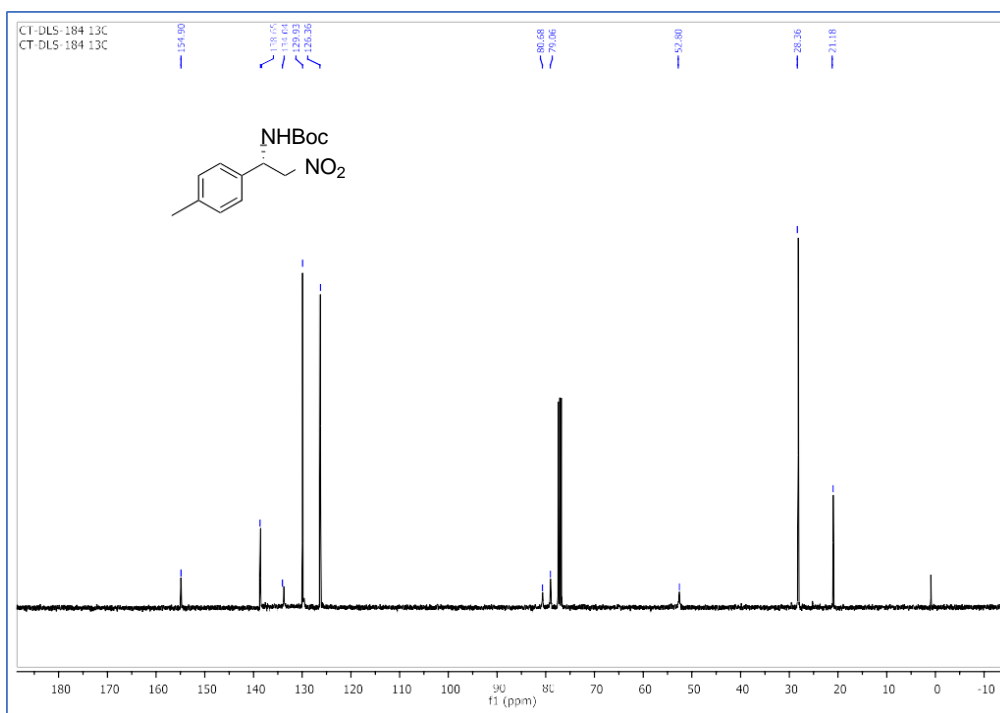

Figure 12. <sup>13</sup>C NMR spectrum of compound 2f

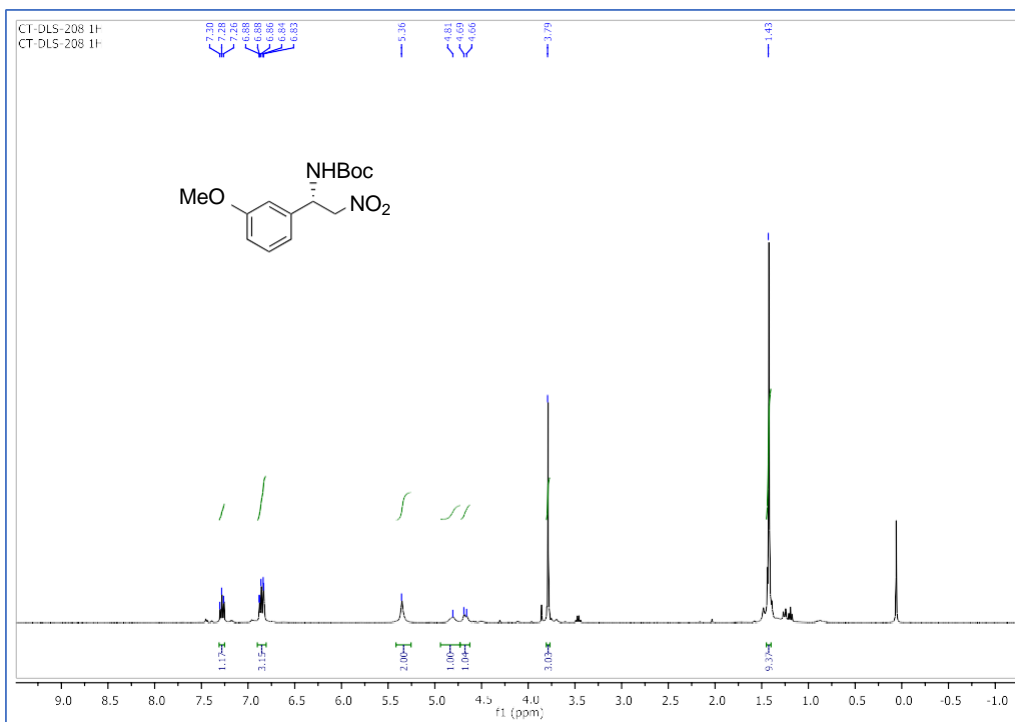

Figure 13. <sup>1</sup>H NMR spectrum of compound 2g

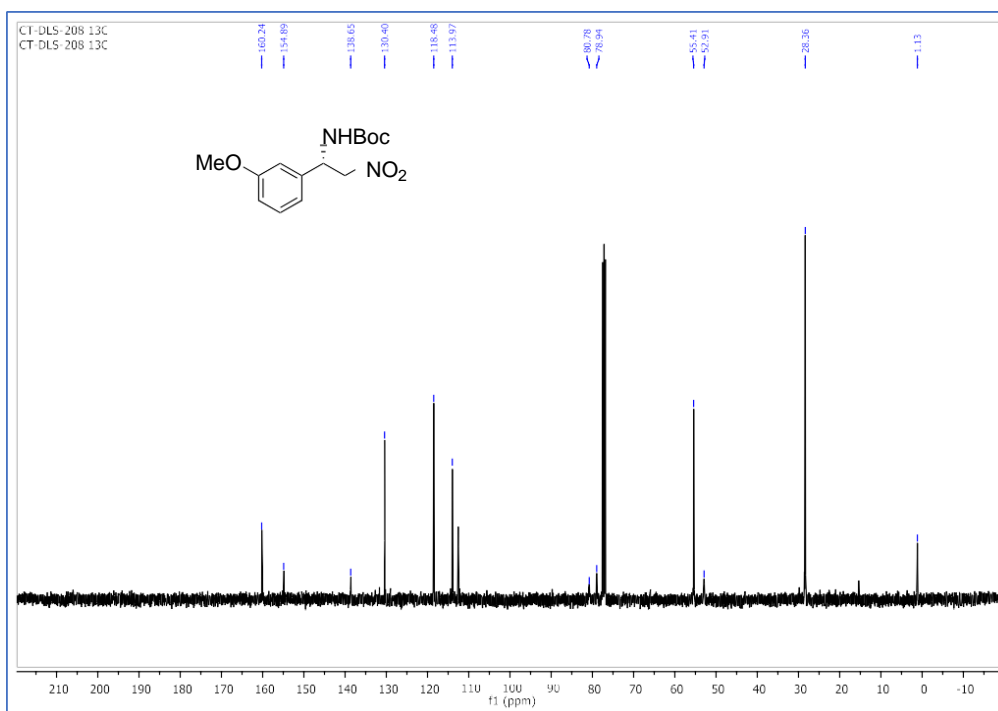

Figure 14. <sup>13</sup>C NMR spectrum of compound 2g



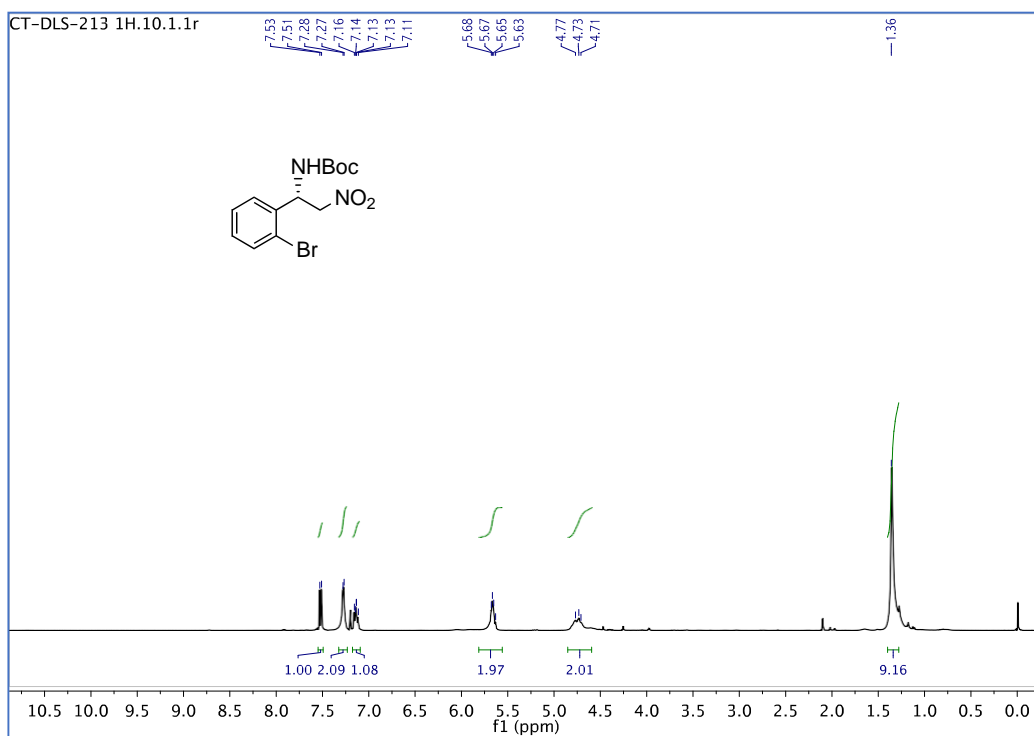

Figure 15.  $^1\text{H}$  NMR spectrum of compound 2h

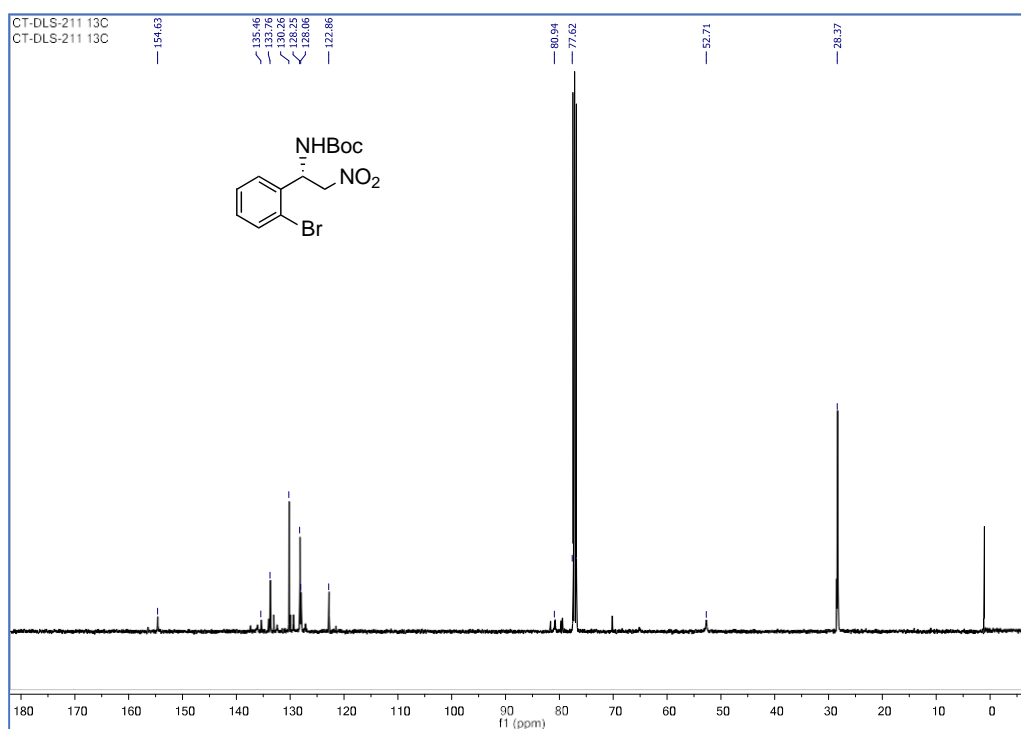

Figure 16.  $^{13}\text{C}$  NMR spectrum of compound 2h

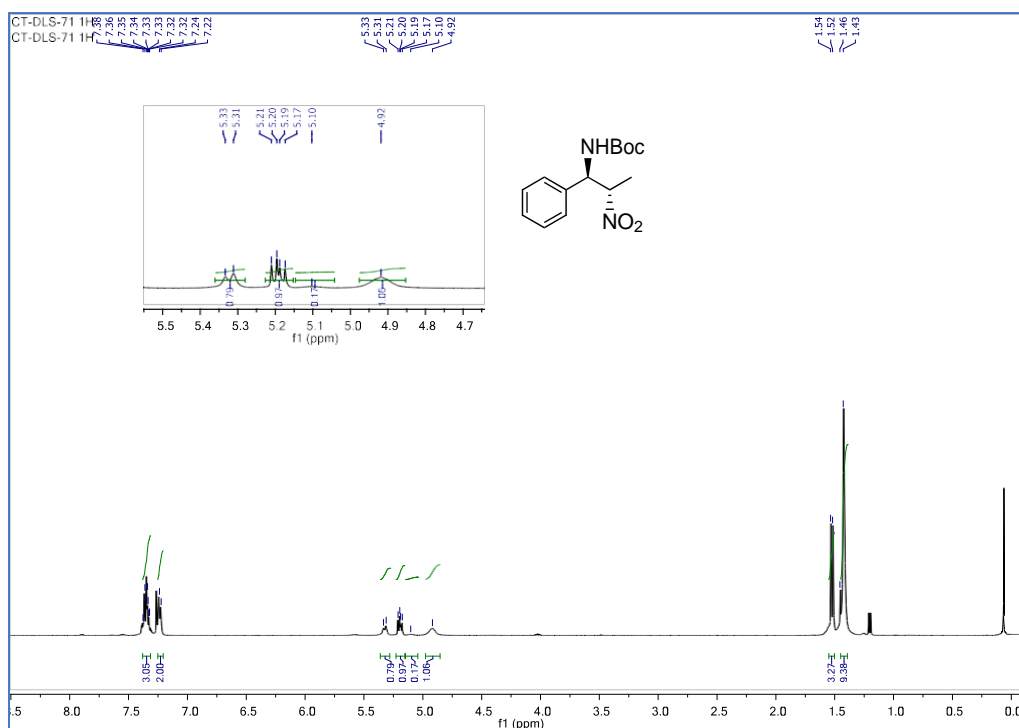

Figure 17. <sup>1</sup>H NMR spectrum of diastereomeric mixture 3a

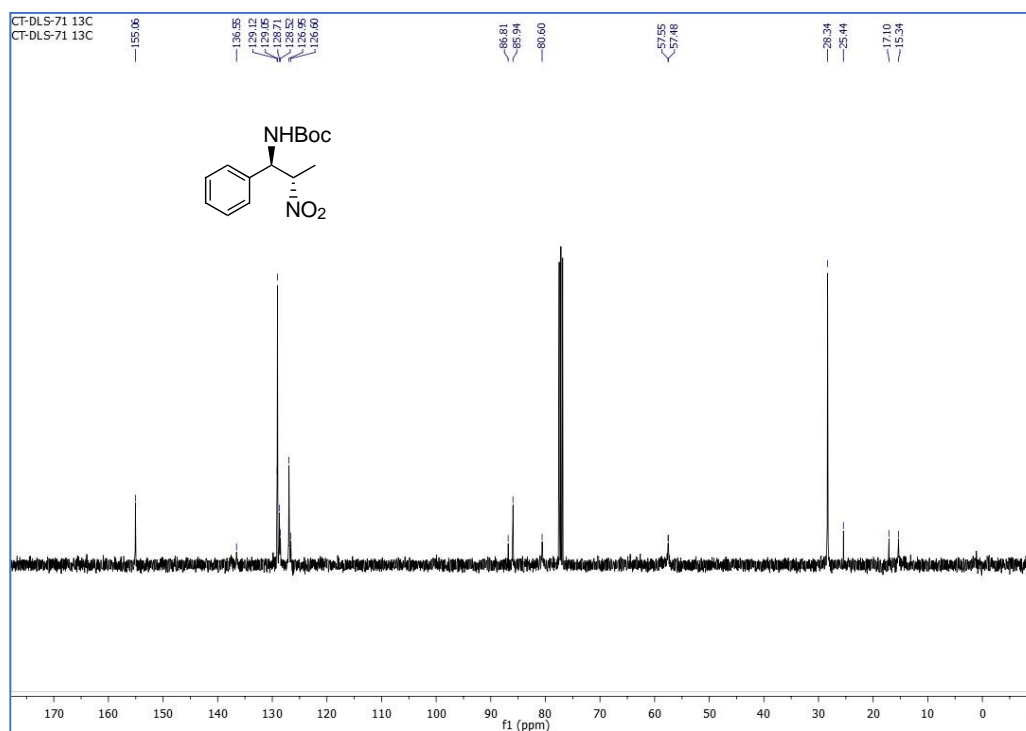

Figure 18. <sup>13</sup>C NMR spectrum of diastereomeric mixture 3a

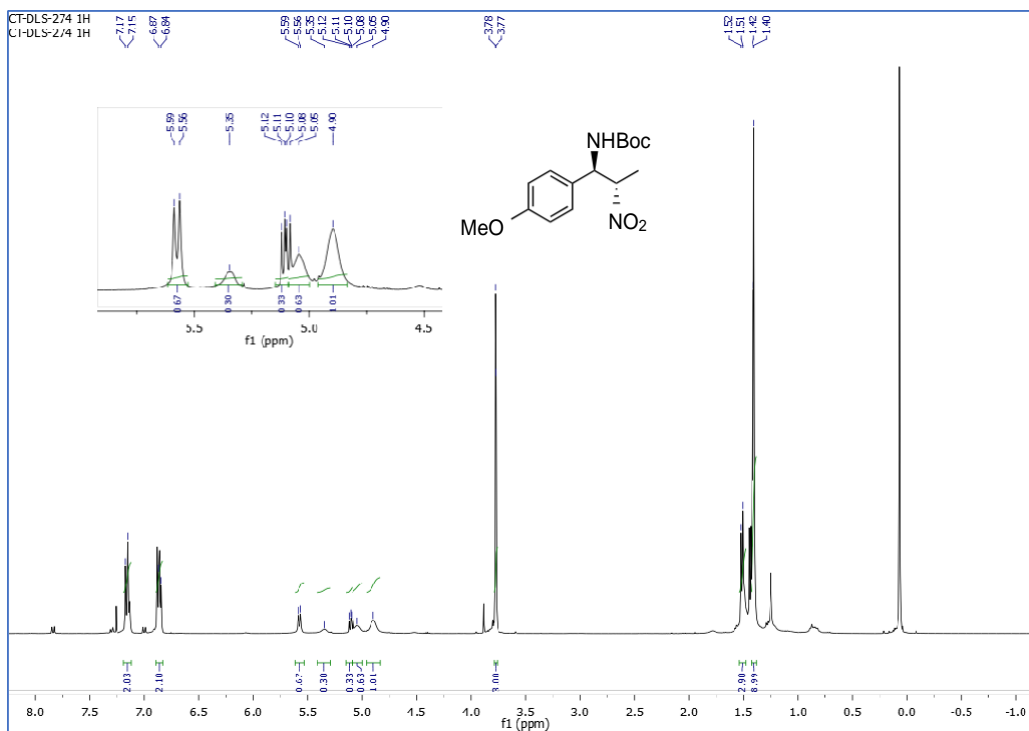

Figure 19. <sup>1</sup>H NMR spectrum of diastereomeric mixture **3b**

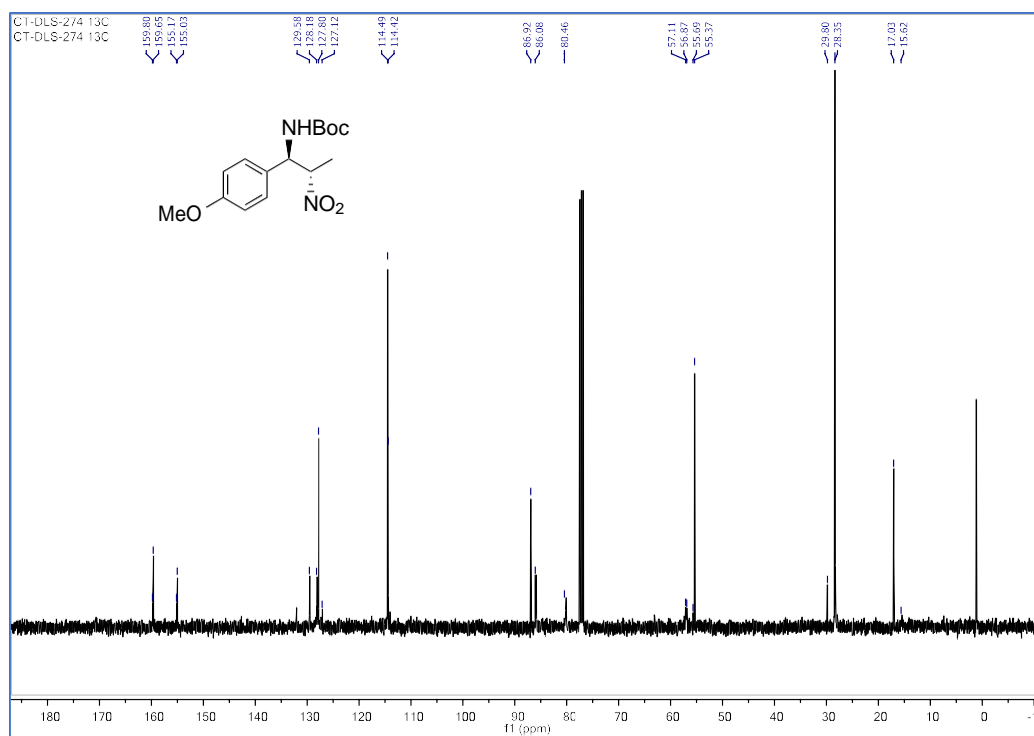

Figure 20. <sup>13</sup>C NMR spectrum of diastereomeric mixture **3b**

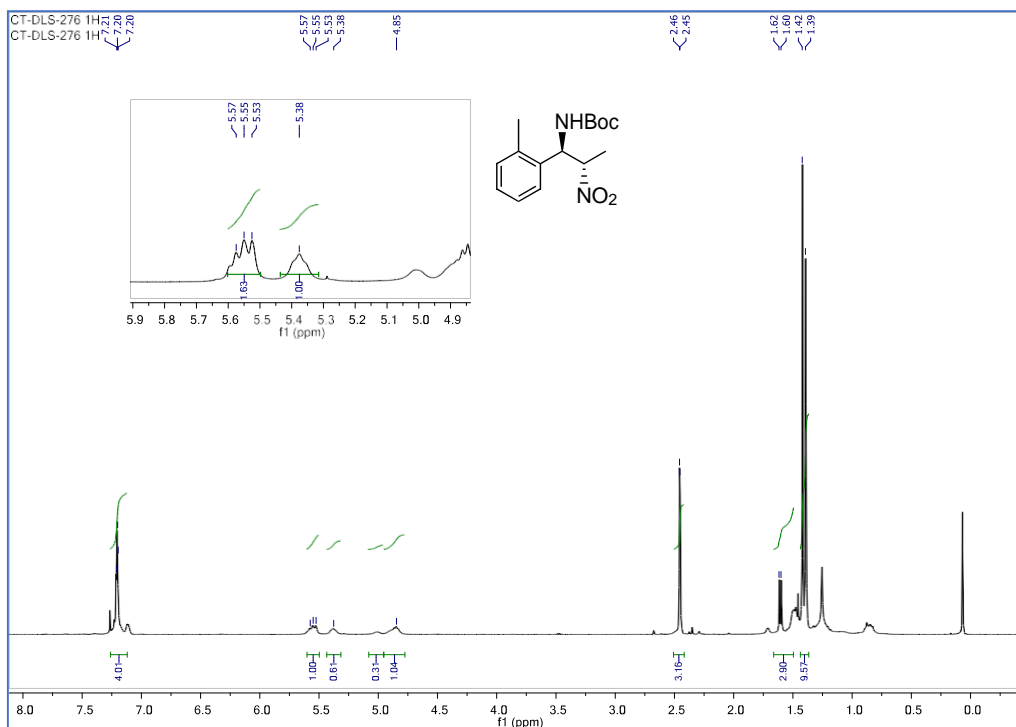

Figure 21. <sup>1</sup>H NMR spectrum of diastereomeric mixture **3c**

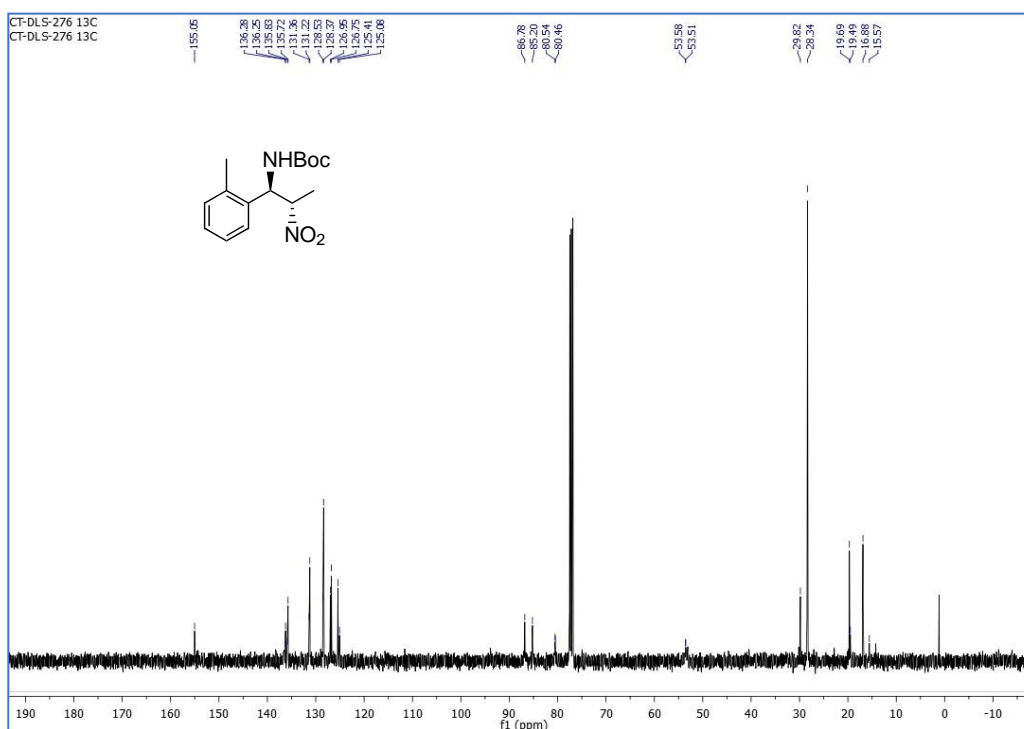

Figure 22. <sup>13</sup>C NMR spectrum of diastereomeric mixture **3c**

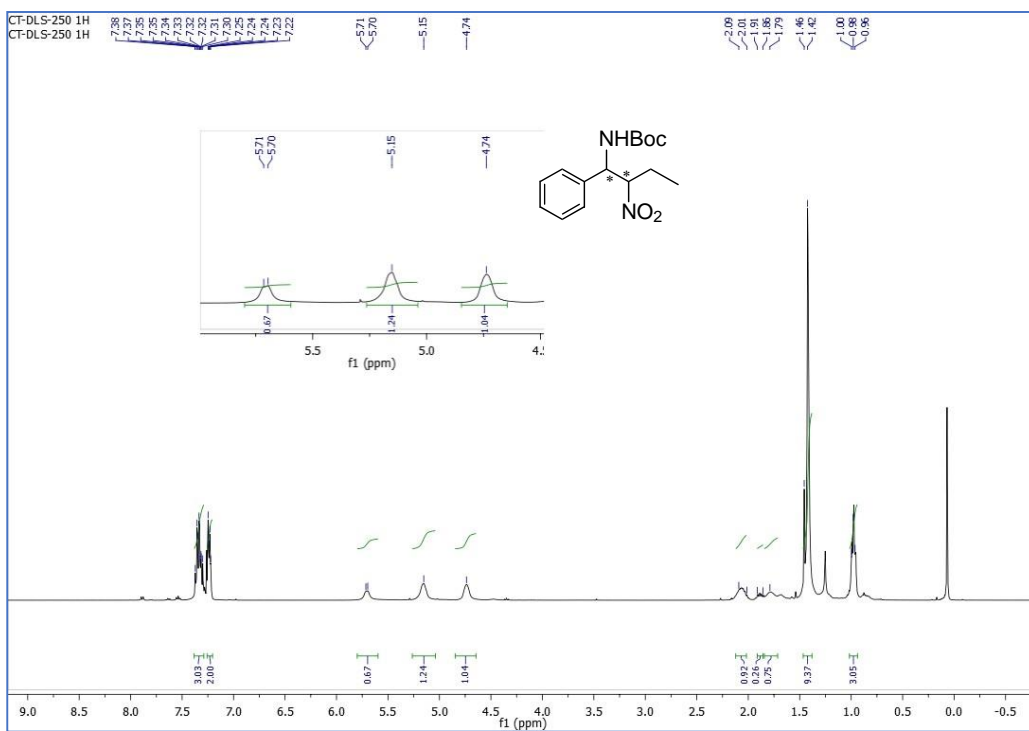

Figure 23. <sup>1</sup>H NMR spectrum of diastereomeric mixture **4a**

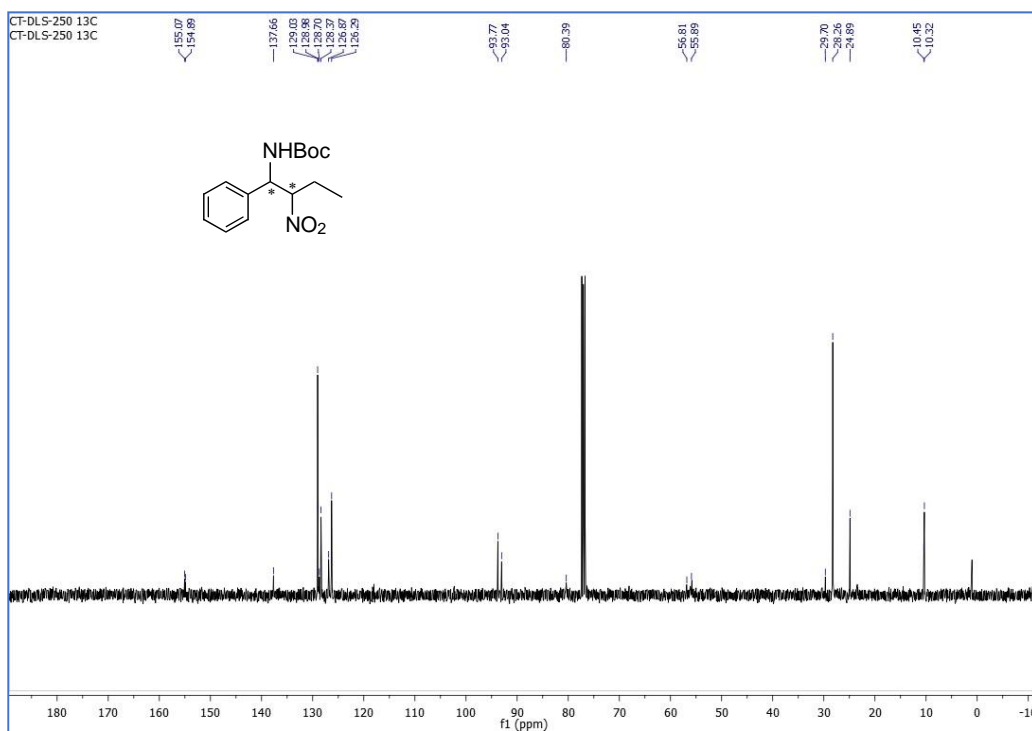

Figure 24. <sup>13</sup>C NMR spectrum of diastereomeric mixture **4a**

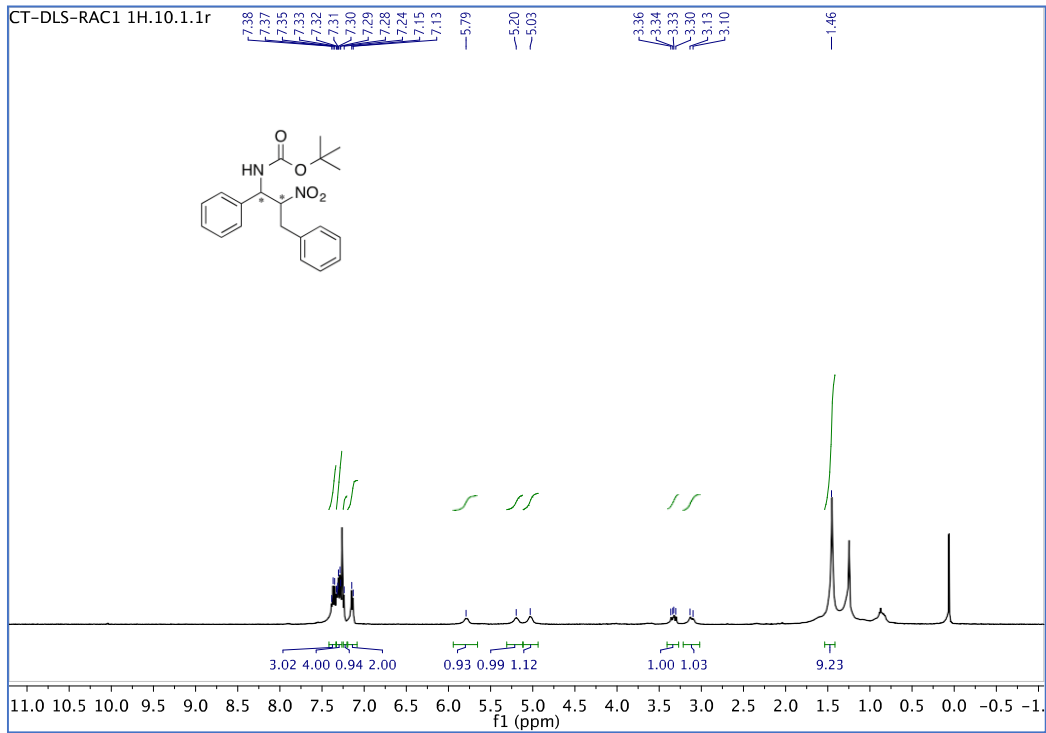

Figure 25.  $^1\text{H}$  NMR spectrum of *anti* 5a

## 2. HPLC Chromatograms

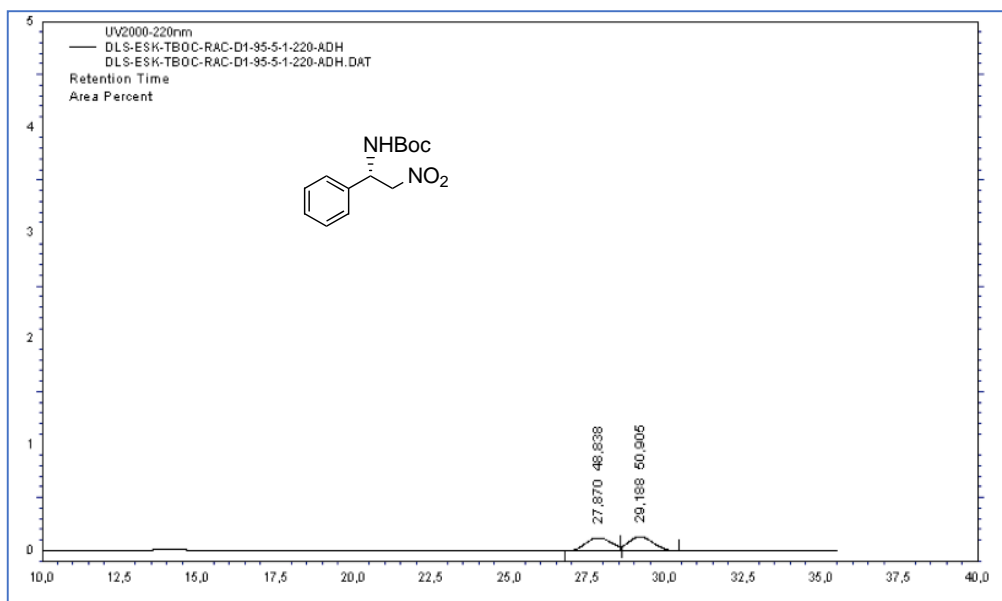

Figure 26. HPLC chromatogram of *rac*-2a

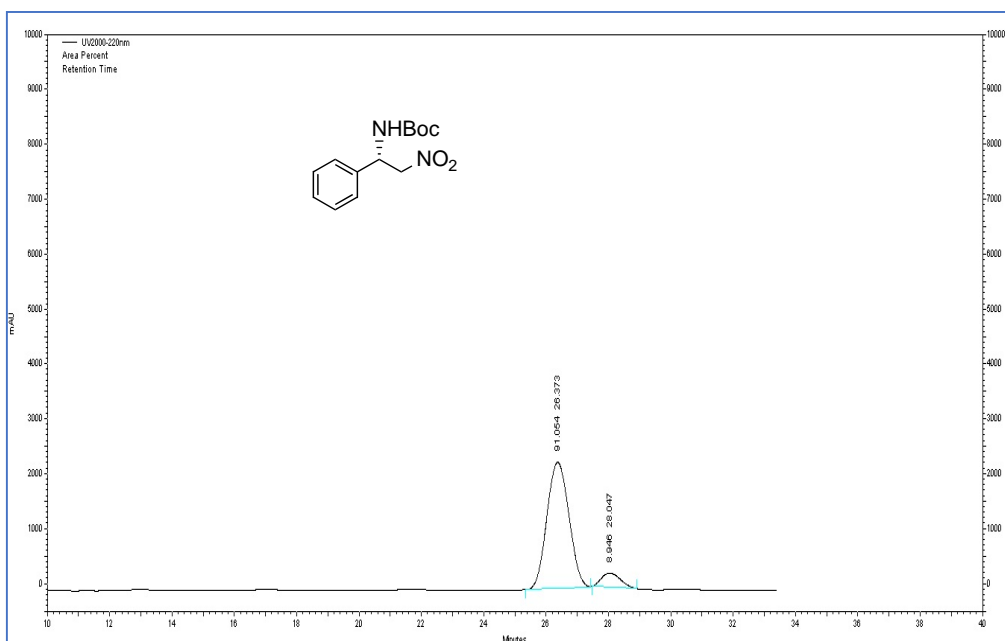

Figure 27. HPLC chromatogram of enantiomerically enriched 2a

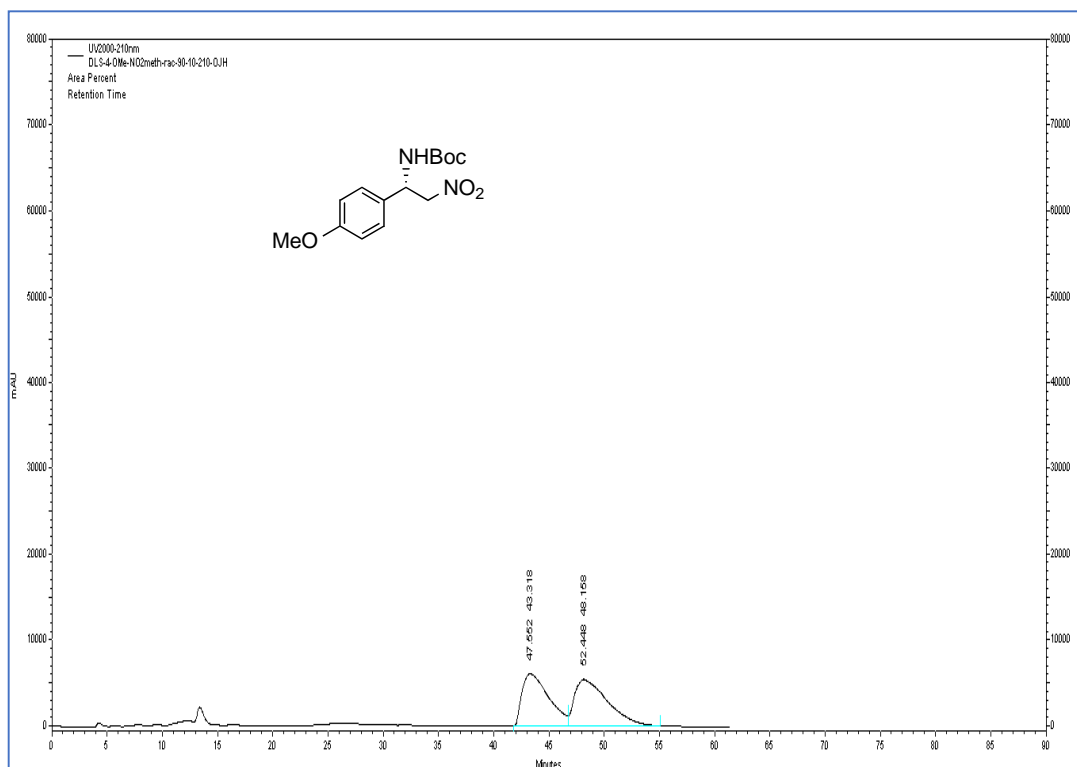

Figure 28. HPLC chromatogram of *rac*-2b

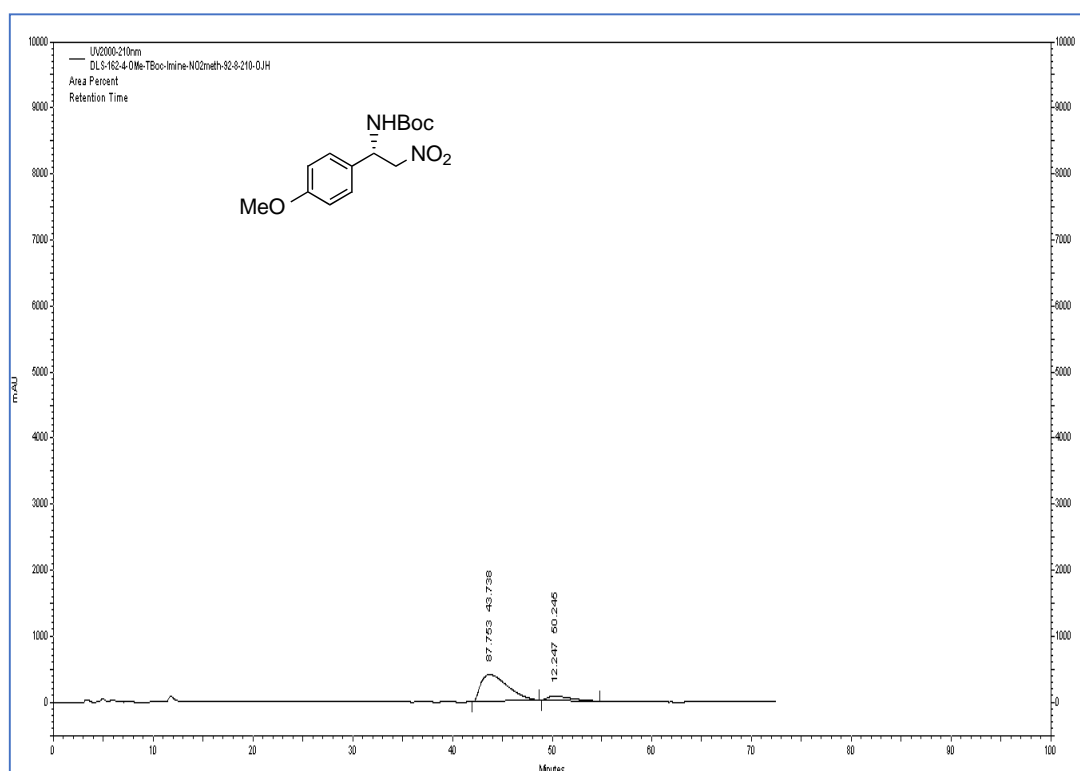

Figure 29. HPLC chromatogram of enantiomerically enriched 2b



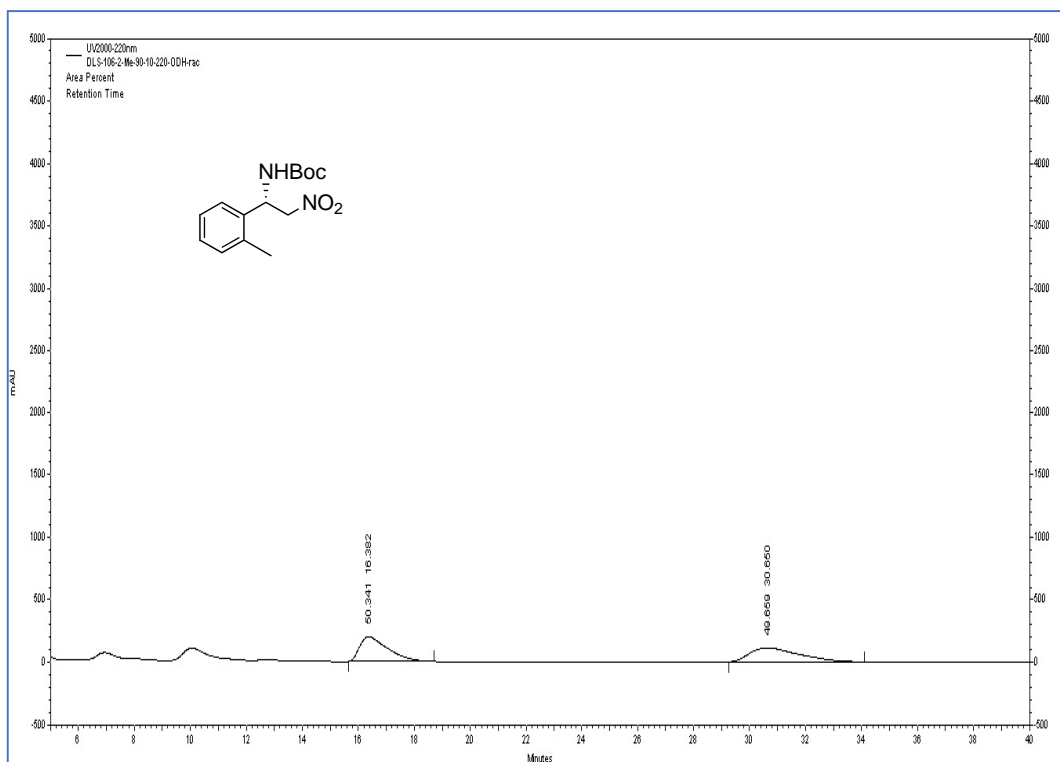

Figure 30. HPLC chromatogram of *rac*-2c

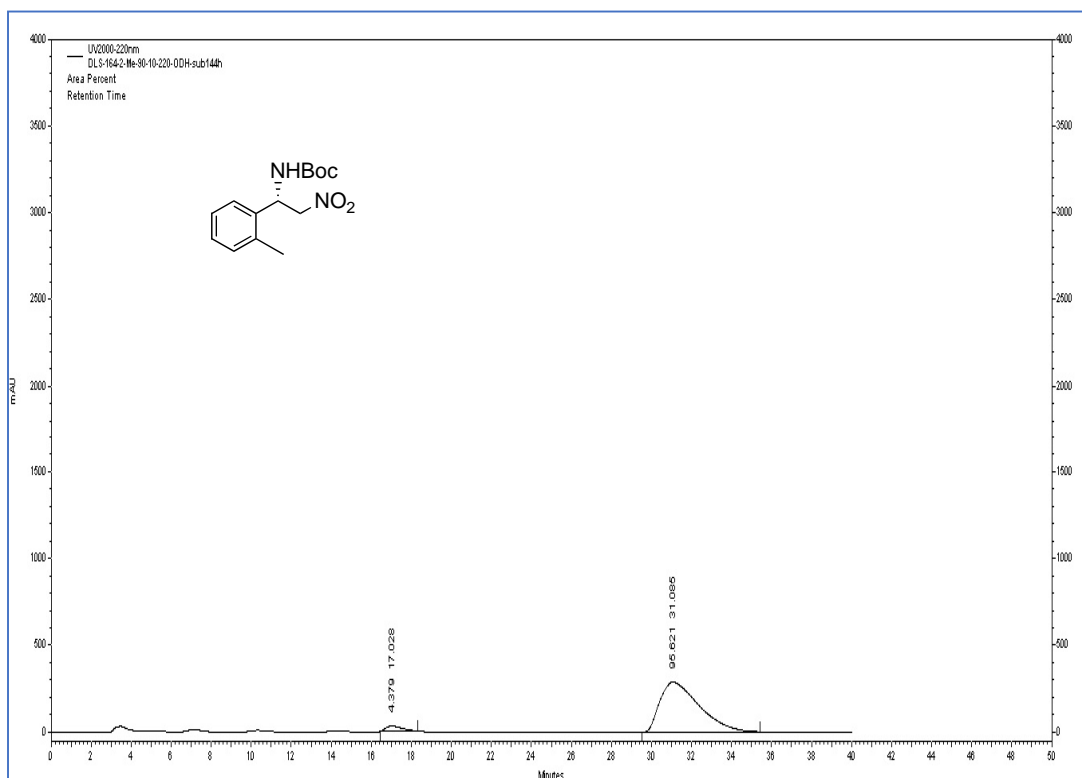

Figure 31. HPLC chromatogram of enantiomerically enriched 2c

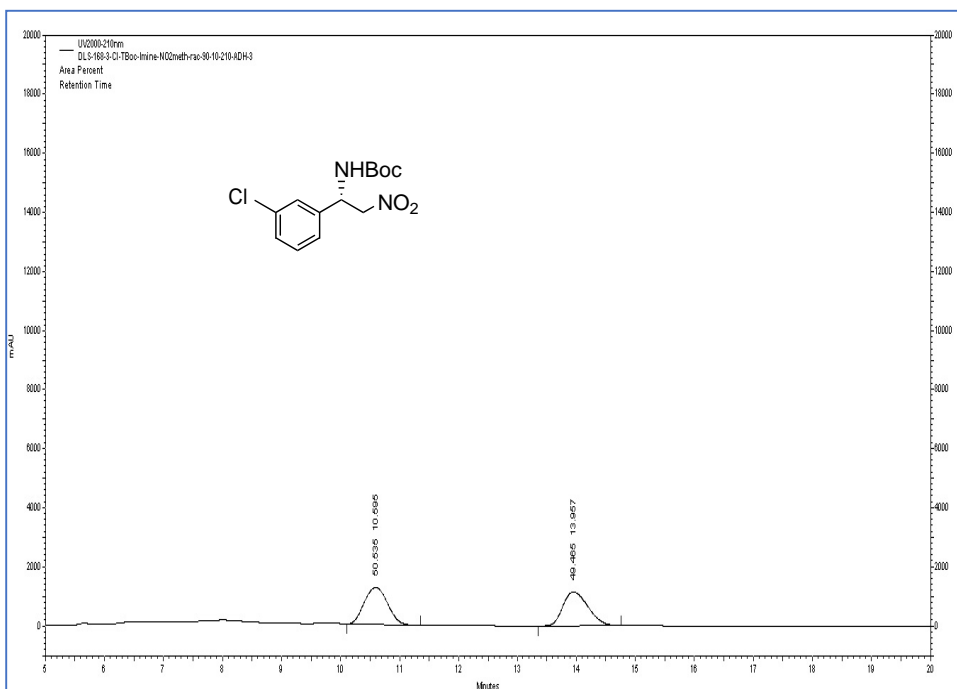

**Figure 32.** HPLC chromatogram of *rac-2d*

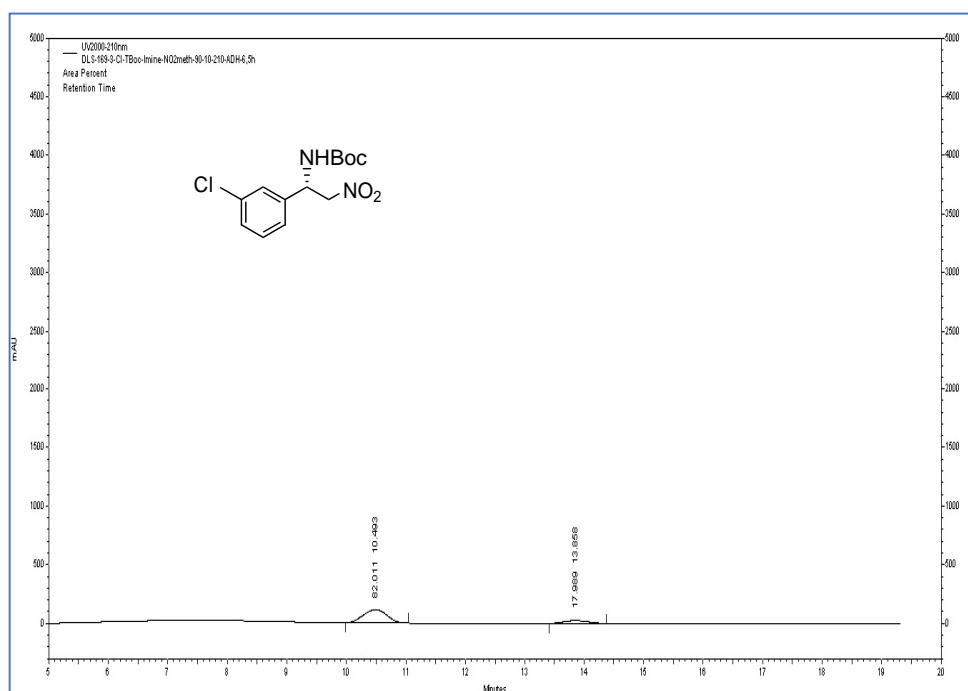

**Figure 33.** HPLC chromatogram of enantiomerically enriched **2d**

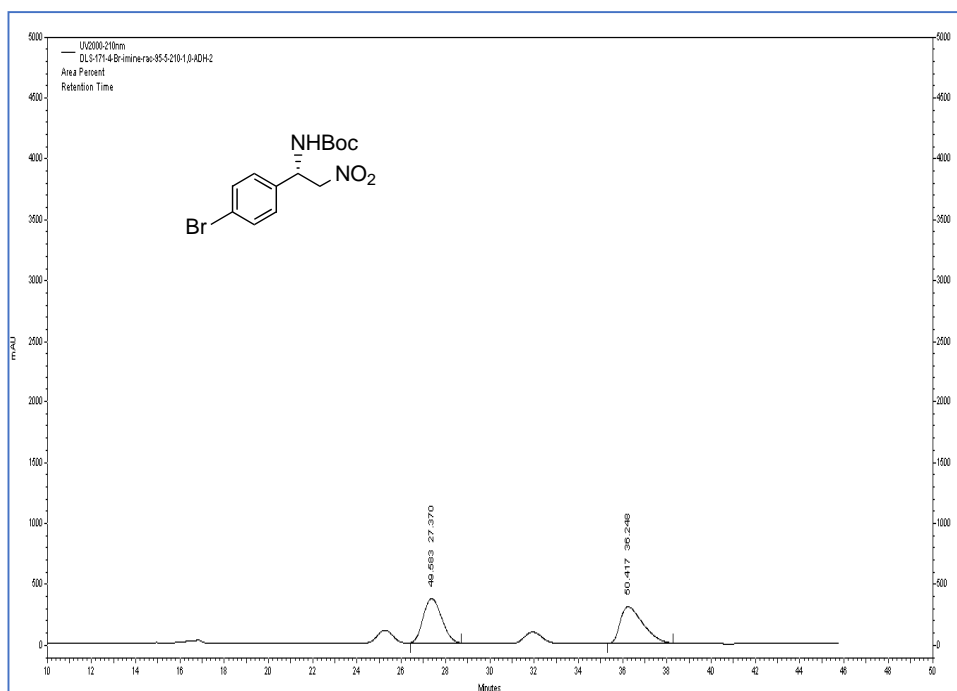

Figure 34. HPLC chromatogram of *rac*-2e

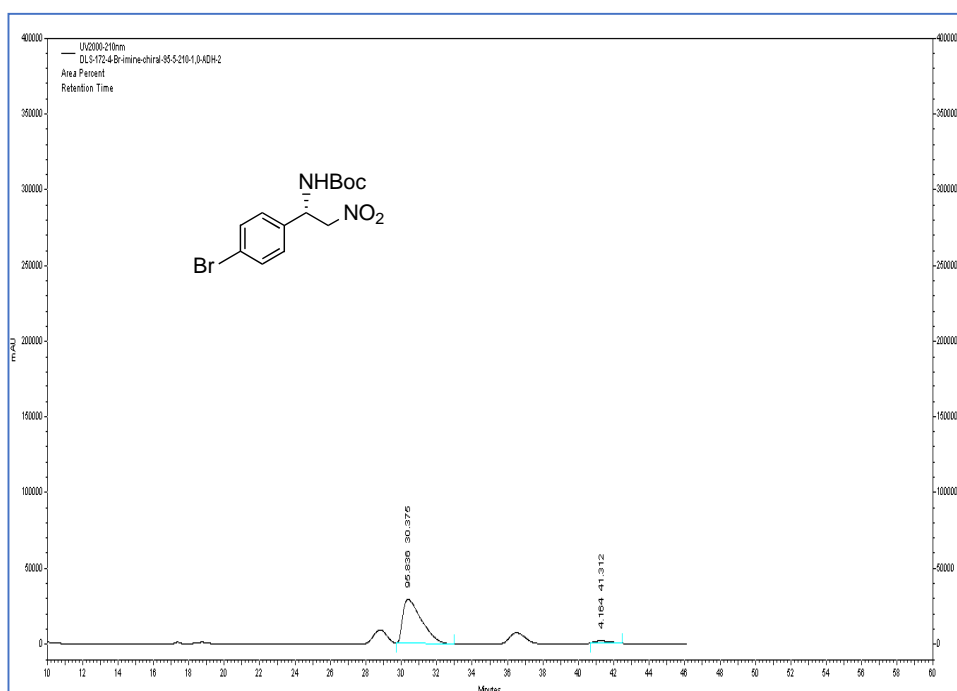

Figure 35. HPLC chromatogram of enantiomerically enriched 2e

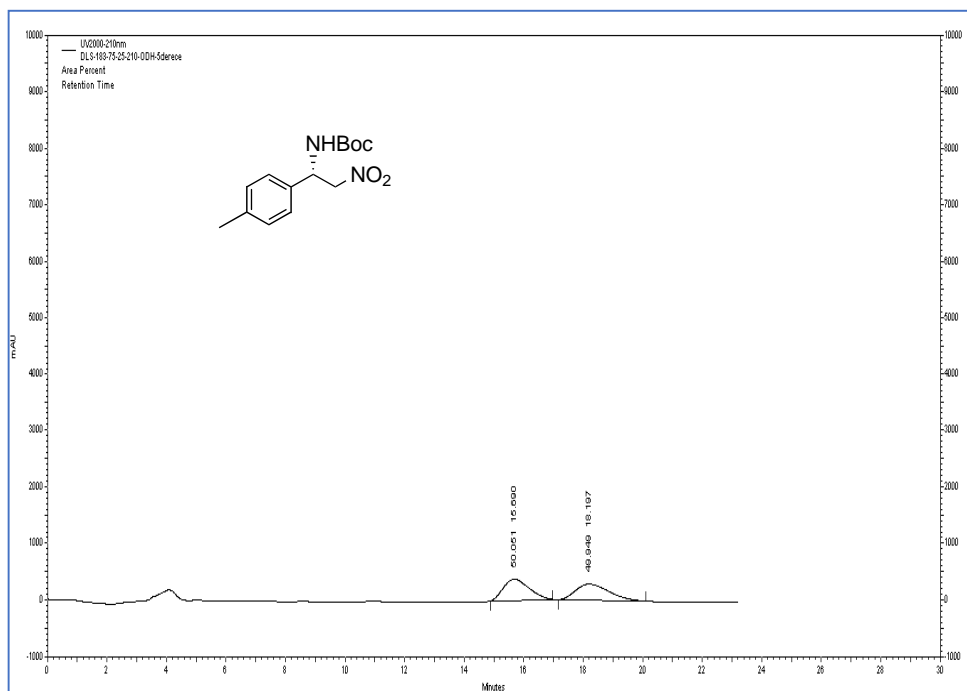

Figure 36. HPLC chromatogram of *rac-2f*

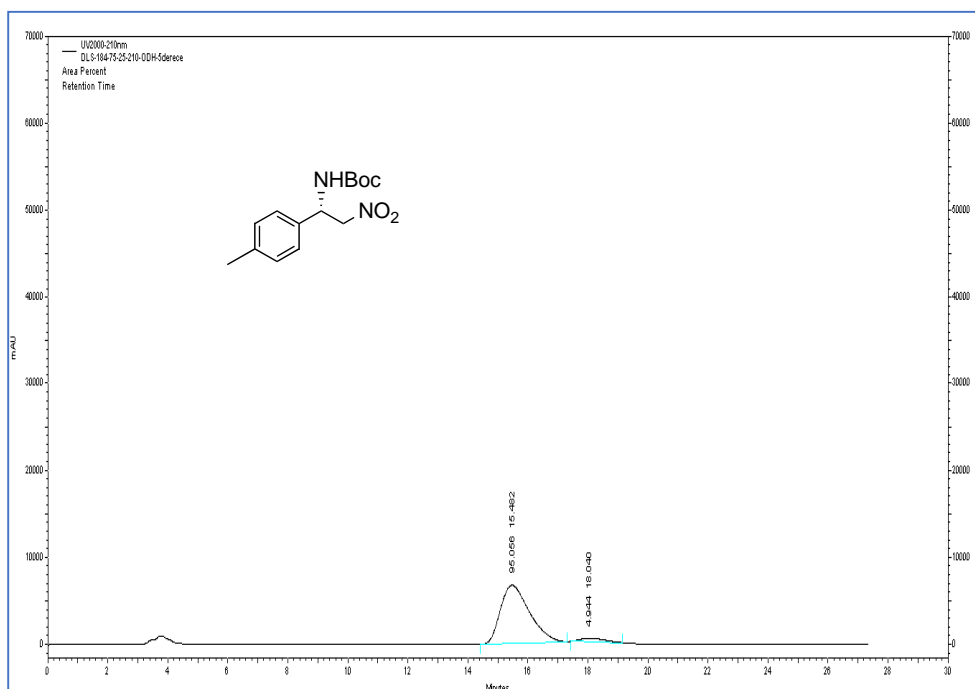

Figure 37. HPLC chromatogram of enantiomerically enriched **2f**

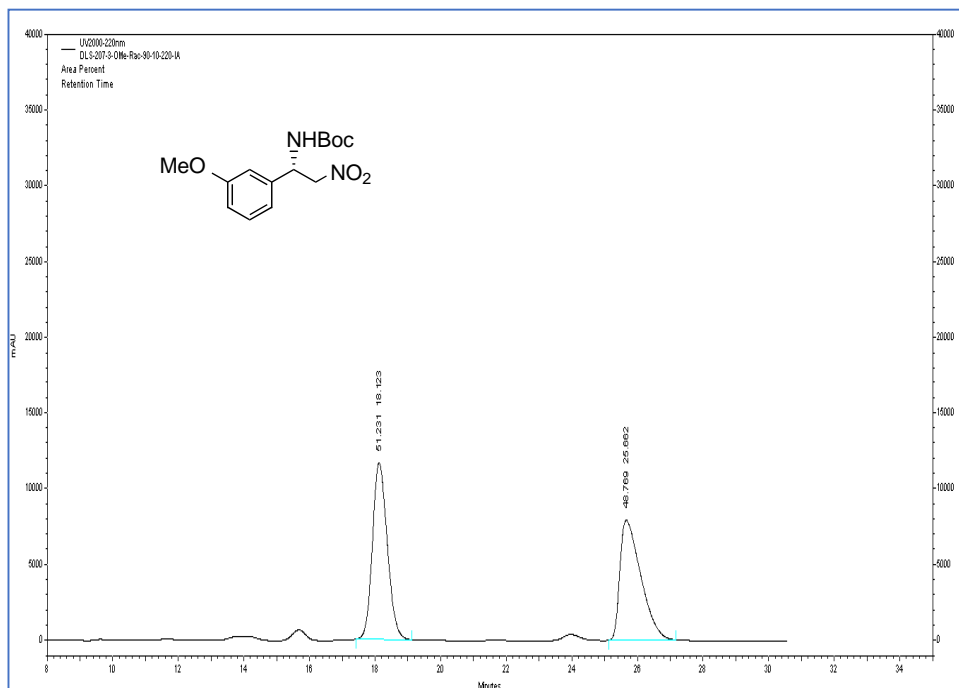

**Figure 38.** HPLC chromatogram of *rac-2g*

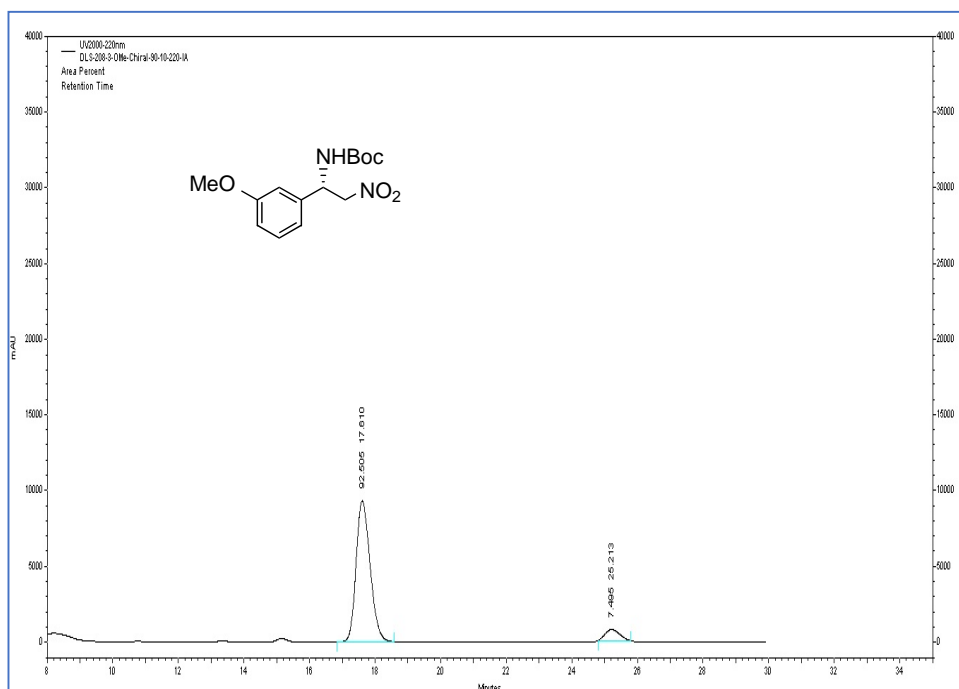

**Figure 39.** HPLC chromatogram of enantiomerically enriched **2g**

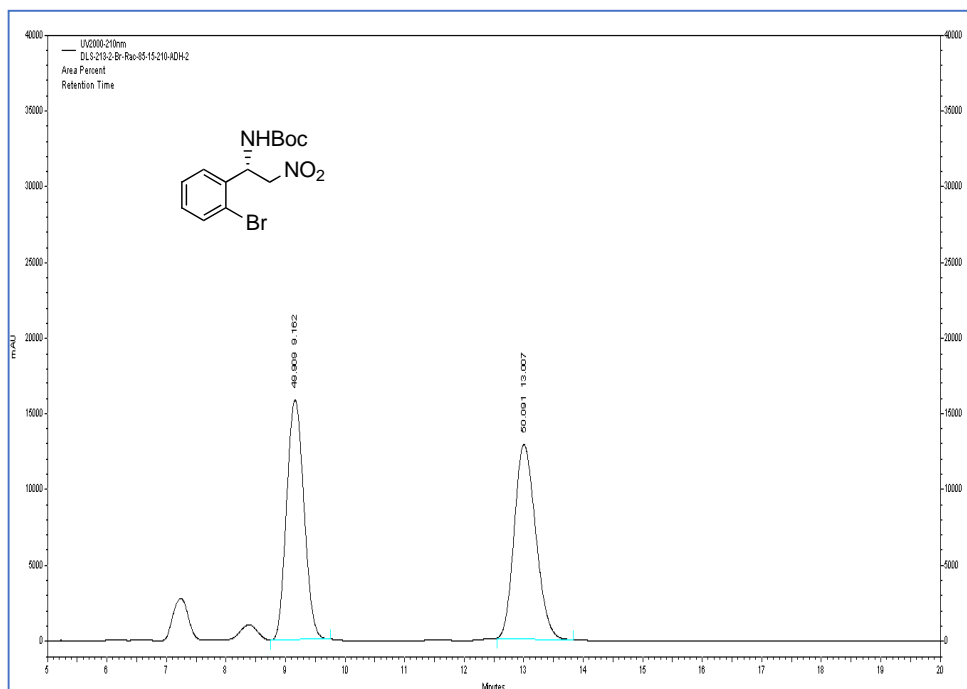

Figure 40. HPLC chromatogram of *rac*-2h

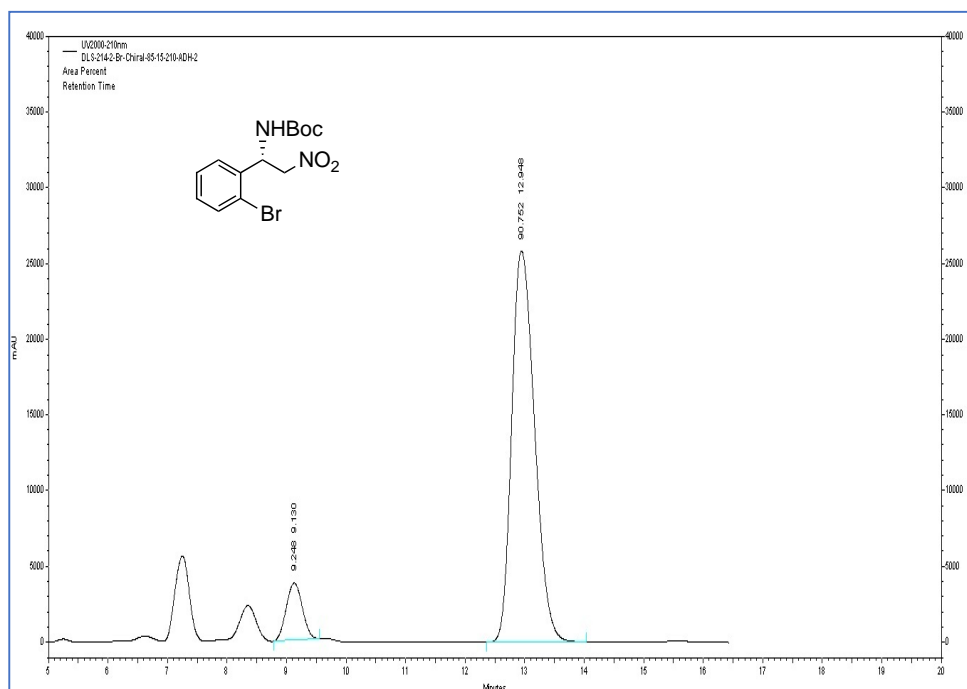

Figure 41. HPLC chromatogram of enantiomerically enriched 2h

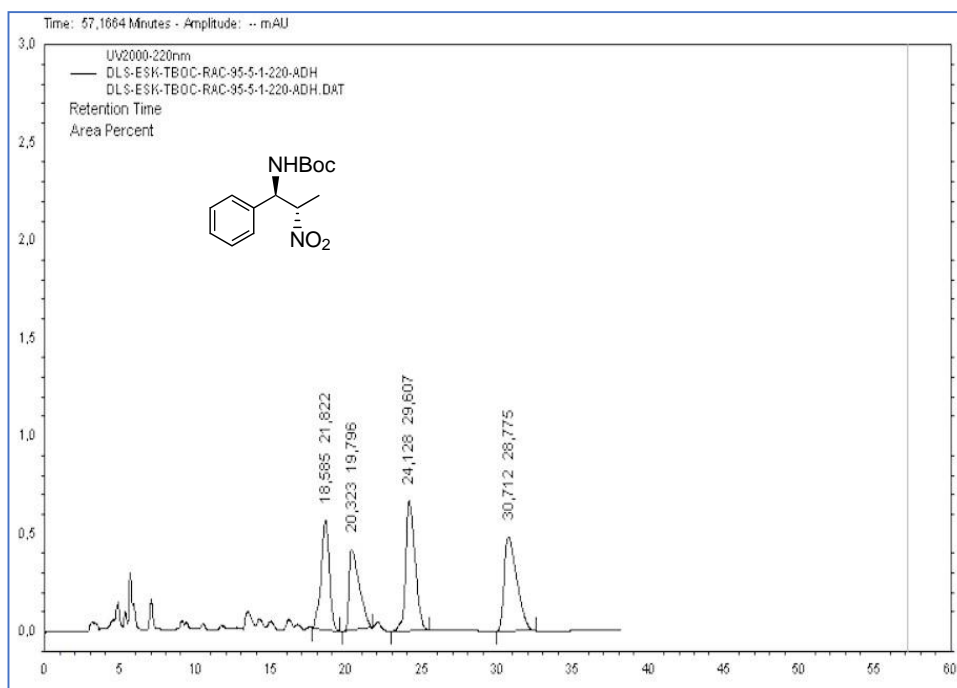

**Figure 42.** HPLC chromatogram of diastereomeric mixture of *rac*-**3a**

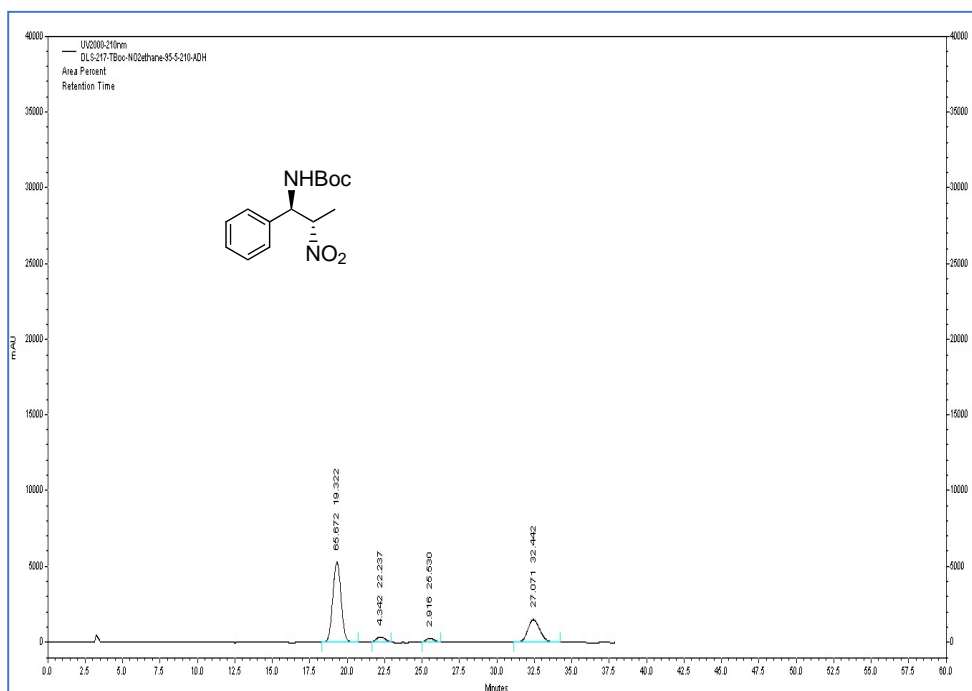

**Figure 43.** HPLC chromatogram of enantiomerically enriched **3a**

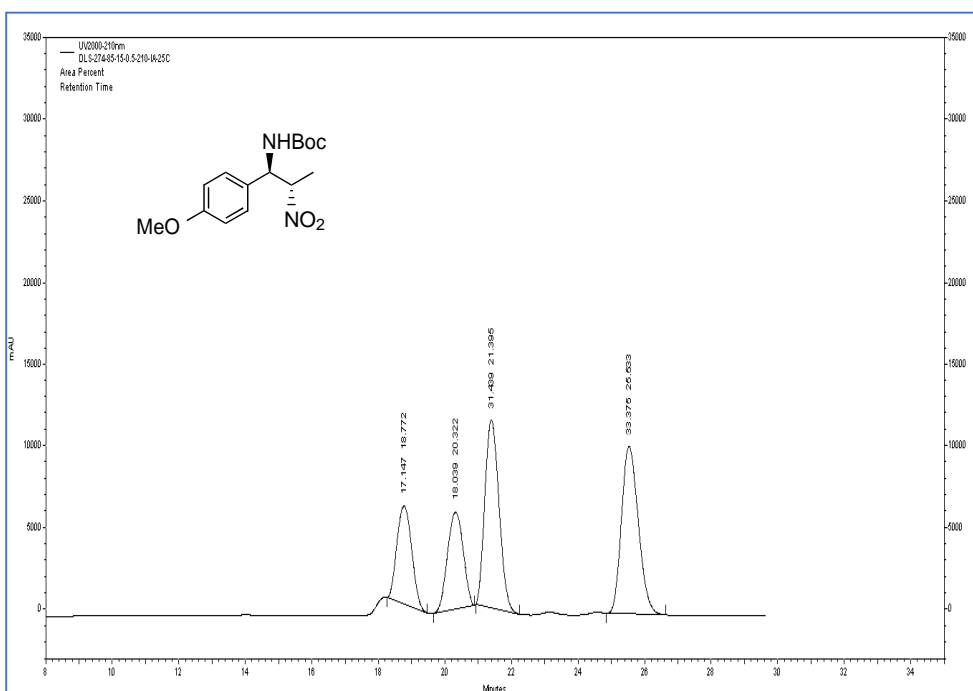

**Figure 44.** HPLC chromatogram of diastereomeric mixture of *rac*-**3b**

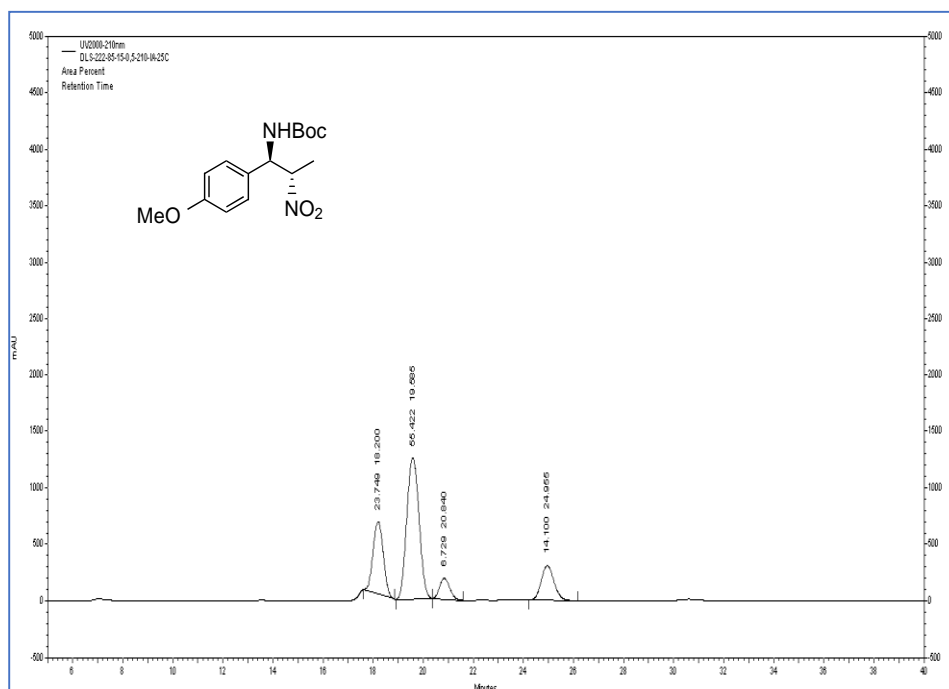

**Figure 45.** HPLC chromatogram of enantiomerically enriched **3b**



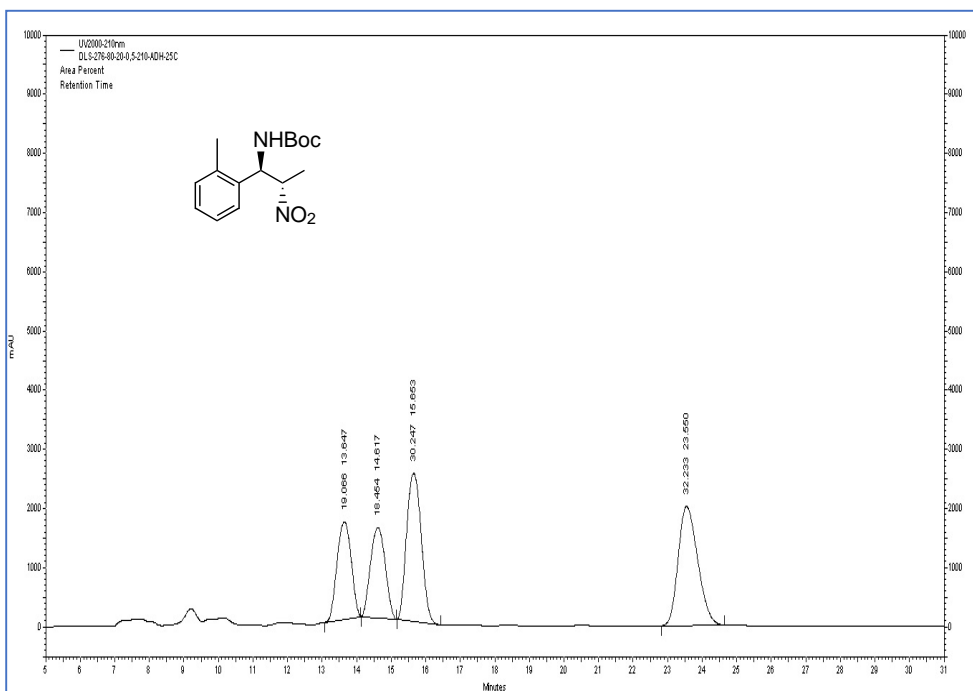

Figure 46. HPLC chromatogram of *rac*-3c

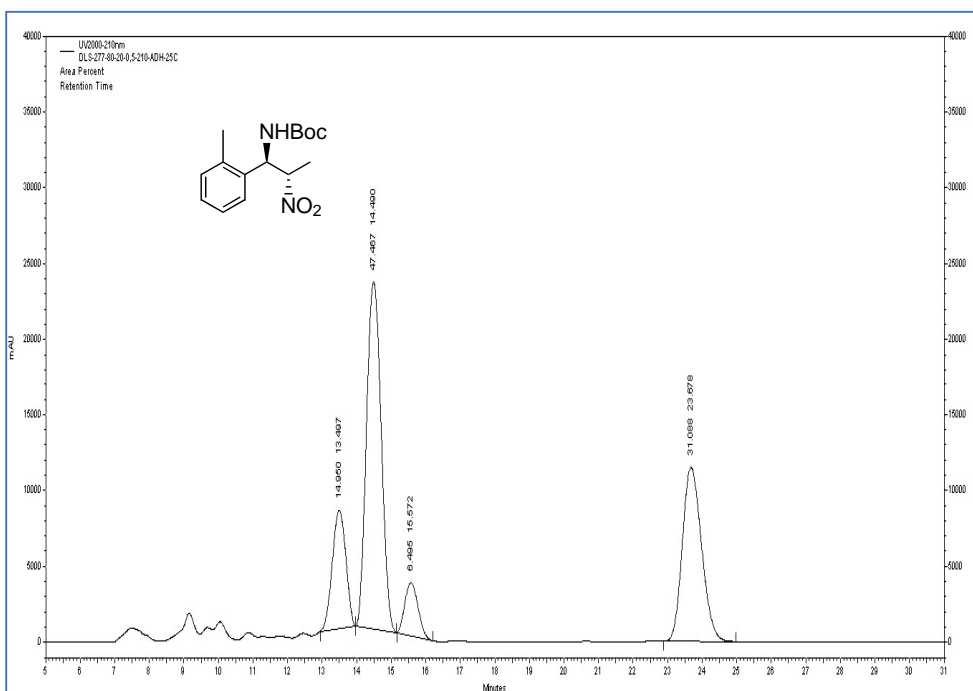

Figure 47. HPLC chromatogram of enantiomerically enriched 3c

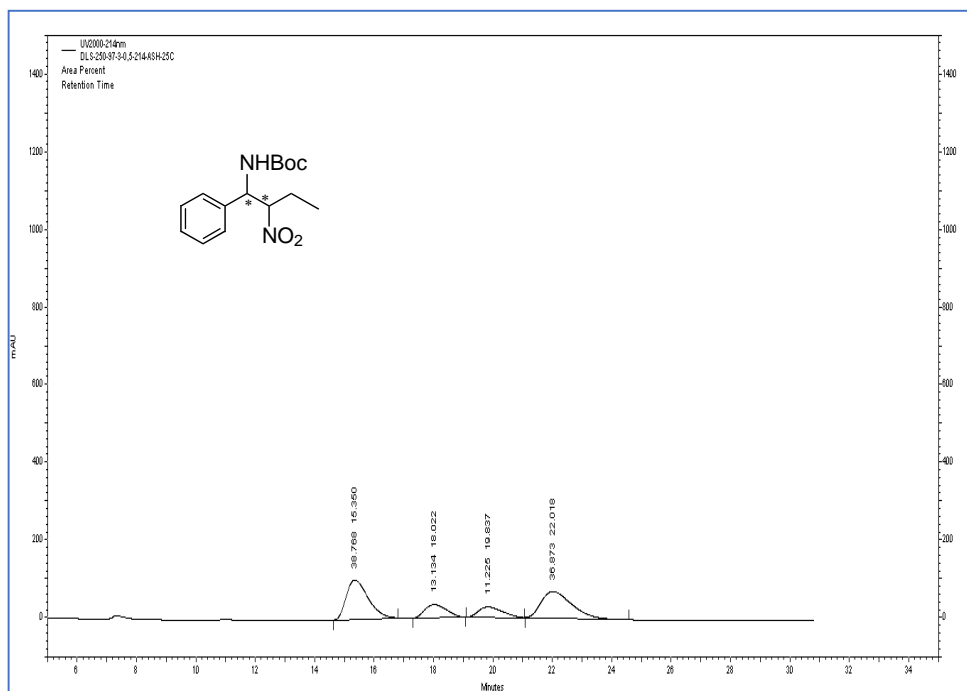

Figure 48. HPLC chromatogram of *rac*-4a

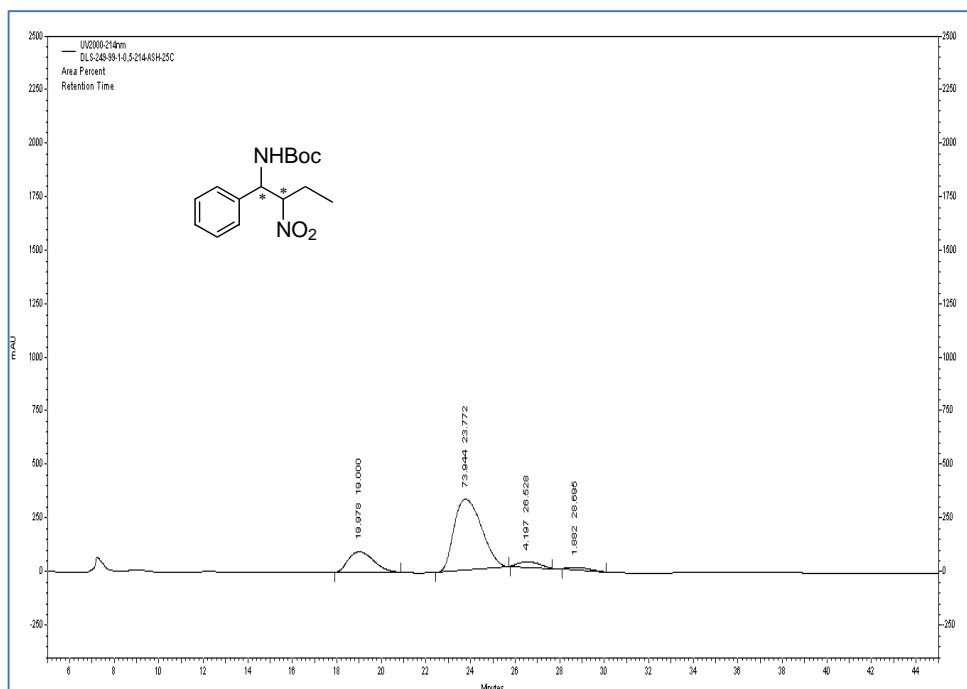

Figure 49. HPLC chromatogram of enantiomerically enriched 4a

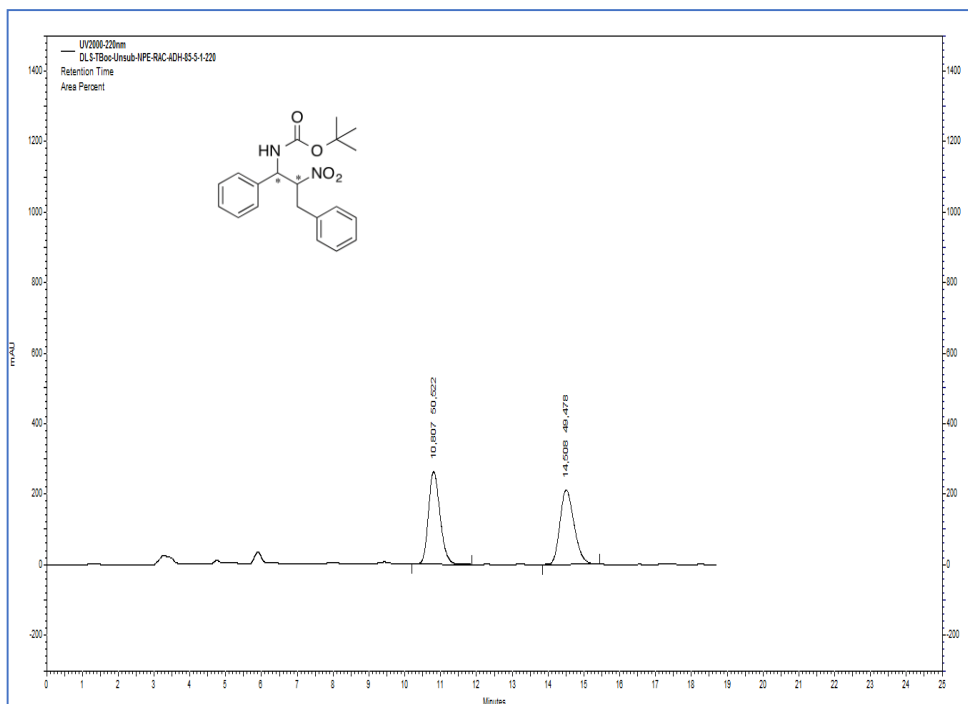

**Figure 50.** HPLC chromatogram of *rac-anti-5a*

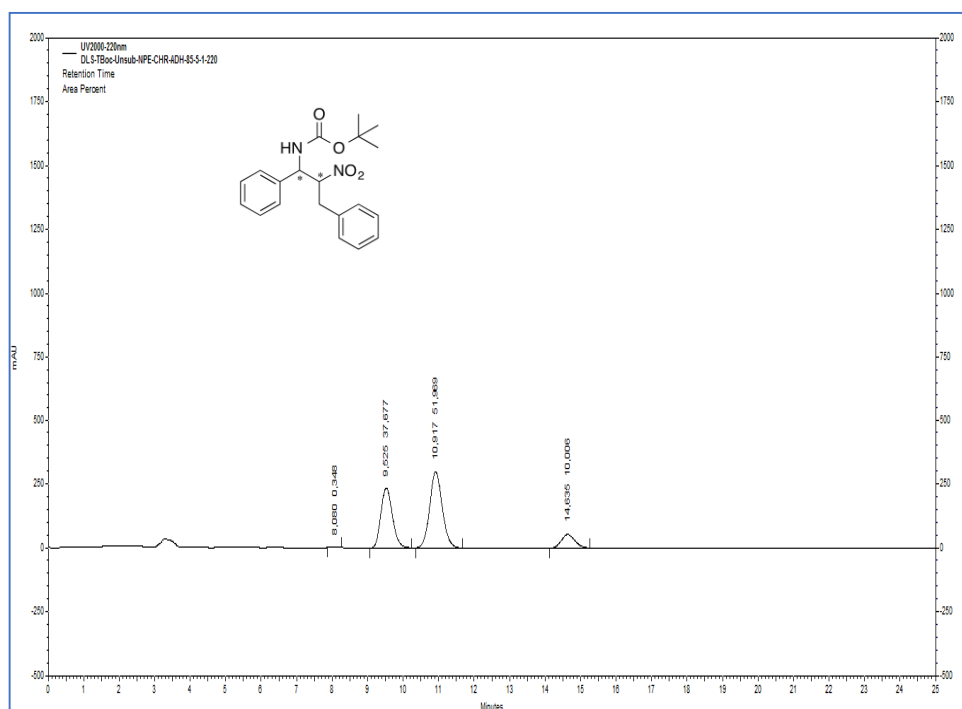

**Figure 51.** HPLC chromatogram of enantiomerically enriched **5a**
